# Supplementary material for: Pandora’s Box in the Deep Sea –Intraspecific Diversity Patterns and Distribution of Two Congeneric Scavenging Amphipods
Source: Frontiers journal article supplement (doi:10.3389/fmars.2021.750180), 2021-12-07
Supplement: Table_1.XLSX [file Table_1.XLSX]

## Sheet: Lab Sheet
Supplementary Material S1. The summary of all sequences used in the study including identification (in case of published material presented as in the original papers), Barcode Index Numbers (BIN), station data and GenBank Accession Numbers.
Project Code	Process ID	Sample ID	BIN	28S GenBank Accession Number	16S GenBank Accession Number	COI-5P GenBank Accession Number	Identification	Institution	Literature source	Family	Genus	Species	Taxonomy Notes	Collectors	Collection Date	Country/Ocean	State/Province	Region	Sector	Exact Site	Lat	Lon	Depth	Sampling Protocol	Site Code
GBCM	GBCM4393-17	LC229094	BOLD:ADJ8775			LC229094	Eurythenes aequilatus	Mined from GenBank, NCBI	Narahara-Nakano et al. 2018	Eurytheneidae	Eurythenes	Eurythenes aequilatus				Japan	NWP	Hokkaido, off west of Shiretoko Peninsula			44.58	144.7
AJAKK	AJAKK812-17	12-4S_Pard3_2012_1	BOLD:ADF5858	MZ655904	MN228778	MN346450	Vemana	University of Lodz, Dept of Invertebrate Zoology and Hydrobiology	Jażdżewska & Mamos 2019	Vemanidae	Vemana		provisional species identification, Vemana sp. 1	Angelika Brandt	31-Aug-2012	Pacific Ocean	NWP	Kuril-Kamchatka			39.7107	147.158	5224	Epibenthic sled, supra-net	SO-223-12-4
GBA	GBMND14880-21	MN262181	BOLD:ACZ6441		MN251334	MN262181	Paralicella tenuipes	Mined from GenBank, NCBI	Weston et al. 2021	Alicellidae	Paralicella	Paralicella tenuipes			10-Jun-2017	Indian Ocean	IO	Wallaby-Zenith Fracture Zone			-22.2655	102.441	6537
GBA	GBMND14879-21	MN262179	BOLD:ACZ6441		MN251332	MN262179	Paralicella tenuipes	Mined from GenBank, NCBI	Weston et al. 2021	Alicellidae	Paralicella	Paralicella tenuipes			11-Jun-2017	Indian Ocean	IO	Wallaby-Zenith Fracture Zone			-22.2429	102.471	5990
GBA	GBMND14878-21	MN262180	BOLD:ACZ6441		MN251333	MN262180	Paralicella tenuipes	Mined from GenBank, NCBI	Weston et al. 2021	Alicellidae	Paralicella	Paralicella tenuipes			11-Jun-2017	Indian Ocean	IO	Wallaby-Zenith Fracture Zone			-22.2097	102.506	4932
GBA	GBMND14877-21	MN262177	BOLD:ACZ5625		MN251329	MN262177	Paralicella caperesca	Mined from GenBank, NCBI	Weston et al. 2021	Alicellidae	Paralicella	Paralicella caperesca			29-Jun-2017	Indian Ocean	IO	Afanasy Nikitin Seamount			-3.15903	82.4332	4757
GBA	GBMND14876-21	MN262178	BOLD:ACZ5625		MN251331	MN262178	Paralicella caperesca	Mined from GenBank, NCBI	Weston et al. 2021	Alicellidae	Paralicella	Paralicella caperesca			11-Jun-2017	Indian Ocean	IO	Wallaby-Zenith Fracture Zone			-22.2097	102.506	4932
PASAT	PASAT013-21	DZMB-HH 7964	BOLD:ACZ5625			MZ655819	Paralicella caperesca	Deutsches Zentrum fuer Marine Biodiversitaetsforschung	present study	Alicellidae	Paralicella	Paralicella caperesca		Saskia Brix	21-Jul-2009	Atlantic Ocean	SAtl	Brazilian Basin		Area 02	-26.553	-35.188	4480	baited trap	542/1
PASAT	PASAT012-21	DZMB-HH 7963	BOLD:ACZ5625		MZ655940	MZ655850	Paralicella caperesca	Deutsches Zentrum fuer Marine Biodiversitaetsforschung	present study	Alicellidae	Paralicella	Paralicella caperesca		Saskia Brix	21-Jul-2009	Atlantic Ocean	SAtl	Brazilian Basin		Area 02	-26.553	-35.188	4480	baited trap	542/1
PASAT	PASAT011-21	DZMB-HH 7962	BOLD:ACZ5625		MZ655929	MZ655837	Paralicella caperesca	Deutsches Zentrum fuer Marine Biodiversitaetsforschung	present study	Alicellidae	Paralicella	Paralicella caperesca		Saskia Brix	21-Jul-2009	Atlantic Ocean	SAtl	Brazilian Basin		Area 02	-26.553	-35.188	4480	baited trap	542/1
PASAT	PASAT010-21	DZMB-HH 7961	BOLD:ACZ5625		MZ655963	MZ655880	Paralicella caperesca	Deutsches Zentrum fuer Marine Biodiversitaetsforschung	present study	Alicellidae	Paralicella	Paralicella caperesca		Saskia Brix	21-Jul-2009	Atlantic Ocean	SAtl	Brazilian Basin		Area 02	-26.553	-35.188	4480	baited trap	542/1
PASAT	PASAT009-21	DZMB-HH 7960	BOLD:ACZ5625			MZ655862	Paralicella caperesca	Deutsches Zentrum fuer Marine Biodiversitaetsforschung	present study	Alicellidae	Paralicella	Paralicella caperesca		Saskia Brix	21-Jul-2009	Atlantic Ocean	SAtl	Brazilian Basin		Area 02	-26.553	-35.188	4480	baited trap	542/1
PASAT	PASAT008-21	DZMB-HH 7959	BOLD:ACZ5625			MZ655885	Paralicella caperesca	Deutsches Zentrum fuer Marine Biodiversitaetsforschung	present study	Alicellidae	Paralicella	Paralicella caperesca		Saskia Brix	21-Jul-2009	Atlantic Ocean	SAtl	Brazilian Basin		Area 02	-26.553	-35.188	4480	baited trap	542/1
PASAT	PASAT007-21	DZMB-HH 7958	BOLD:ACZ5625			MZ655860	Paralicella caperesca	Deutsches Zentrum fuer Marine Biodiversitaetsforschung	present study	Alicellidae	Paralicella	Paralicella caperesca		Saskia Brix	21-Jul-2009	Atlantic Ocean	SAtl	Brazilian Basin		Area 02	-26.553	-35.188	4480	baited trap	542/1
PASAT	PASAT006-21	DZMB-HH 7957	BOLD:ACZ5625			MZ655828	Paralicella caperesca	Deutsches Zentrum fuer Marine Biodiversitaetsforschung	present study	Alicellidae	Paralicella	Paralicella caperesca		Saskia Brix	21-Jul-2009	Atlantic Ocean	SAtl	Brazilian Basin		Area 02	-26.553	-35.188	4480	baited trap	542/1
PASAT	PASAT005-21	DZMB-HH 7956	BOLD:ACZ5625			MZ655883	Paralicella caperesca	Deutsches Zentrum fuer Marine Biodiversitaetsforschung	present study	Alicellidae	Paralicella	Paralicella caperesca		Saskia Brix	21-Jul-2009	Atlantic Ocean	SAtl	Brazilian Basin		Area 02	-26.553	-35.188	4480	baited trap	542/1
PASAT	PASAT004-21	DZMB-HH 7954	BOLD:ACZ5625			MZ655829	Paralicella caperesca	Deutsches Zentrum fuer Marine Biodiversitaetsforschung	present study	Alicellidae	Paralicella	Paralicella caperesca		Saskia Brix	21-Jul-2009	Atlantic Ocean	SAtl	Brazilian Basin		Area 02	-26.553	-35.188	4480	baited trap	542/1
PASAT	PASAT003-21	DZMB-HH 7953	BOLD:ACZ5625		MZ655917	MZ655823	Paralicella caperesca	Deutsches Zentrum fuer Marine Biodiversitaetsforschung	present study	Alicellidae	Paralicella	Paralicella caperesca		Saskia Brix	21-Jul-2009	Atlantic Ocean	SAtl	Brazilian Basin		Area 02	-26.553	-35.188	4480	baited trap	542/1
PASAT	PASAT002-21	DZMB-HH 7952	BOLD:ACZ5625		MZ655921	MZ655830	Paralicella caperesca	Deutsches Zentrum fuer Marine Biodiversitaetsforschung	present study	Alicellidae	Paralicella	Paralicella caperesca		Saskia Brix	21-Jul-2009	Atlantic Ocean	SAtl	Brazilian Basin		Area 02	-26.553	-35.188	4480	baited trap	542/1
PASAT	PASAT001-21	DZMB-HH 7951	BOLD:ACZ5625			MZ655827	Paralicella caperesca	Deutsches Zentrum fuer Marine Biodiversitaetsforschung	present study	Alicellidae	Paralicella	Paralicella caperesca		Saskia Brix	21-Jul-2009	Atlantic Ocean	SAtl	Brazilian Basin		Area 02	-26.553	-35.188	4480	baited trap	542/1
PASAT	PASAT043-21	DZMB-HH 8030	BOLD:ACZ6441		MZ655930	MZ655838	Paralicella tenuipes	Deutsches Zentrum fuer Marine Biodiversitaetsforschung	present study	Alicellidae	Paralicella	Paralicella tenuipes		Saskia Brix	21-Jul-2009	Atlantic Ocean	SAtl	Brazilian Basin		Area 02	-26.553	-35.188	4480	baited trap	542/1
PASAT	PASAT042-21	DZMB-HH 8029	BOLD:ACZ6237		MZ655942	MZ655852	Paralicella tenuipes	Deutsches Zentrum fuer Marine Biodiversitaetsforschung	present study	Alicellidae	Paralicella	Paralicella tenuipes		Saskia Brix	21-Jul-2009	Atlantic Ocean	SAtl	Brazilian Basin		Area 02	-26.553	-35.188	4480	baited trap	542/1
PASAT	PASAT041-21	DZMB-HH 8028	BOLD:ACZ6441		MZ655937	MZ655846	Paralicella tenuipes	Deutsches Zentrum fuer Marine Biodiversitaetsforschung	present study	Alicellidae	Paralicella	Paralicella tenuipes		Saskia Brix	21-Jul-2009	Atlantic Ocean	SAtl	Brazilian Basin		Area 02	-26.553	-35.188	4480	baited trap	542/1
PASAT	PASAT040-21	DZMB-HH 8027	BOLD:ACZ6235			MZ655841	Paralicella tenuipes	Deutsches Zentrum fuer Marine Biodiversitaetsforschung	present study	Alicellidae	Paralicella	Paralicella tenuipes		Saskia Brix	21-Jul-2009	Atlantic Ocean	SAtl	Brazilian Basin		Area 02	-26.553	-35.188	4480	baited trap	542/1
PASAT	PASAT039-21	DZMB-HH 8026	BOLD:ACZ6237		MZ655946	MZ655856	Paralicella tenuipes	Deutsches Zentrum fuer Marine Biodiversitaetsforschung	present study	Alicellidae	Paralicella	Paralicella tenuipes		Saskia Brix	21-Jul-2009	Atlantic Ocean	SAtl	Brazilian Basin		Area 02	-26.553	-35.188	4480	baited trap	542/1
PASAT	PASAT038-21	DZMB-HH 8025	BOLD:ACZ6237		MZ655934	MZ655844	Paralicella tenuipes	Deutsches Zentrum fuer Marine Biodiversitaetsforschung	present study	Alicellidae	Paralicella	Paralicella tenuipes		Saskia Brix	21-Jul-2009	Atlantic Ocean	SAtl	Brazilian Basin		Area 02	-26.553	-35.188	4480	baited trap	542/1
PASAT	PASAT037-21	DZMB-HH 8024	BOLD:ACZ6441		MZ655964	MZ655884	Paralicella tenuipes	Deutsches Zentrum fuer Marine Biodiversitaetsforschung	present study	Alicellidae	Paralicella	Paralicella tenuipes		Saskia Brix	21-Jul-2009	Atlantic Ocean	SAtl	Brazilian Basin		Area 02	-26.553	-35.188	4480	baited trap	542/1
PASAT	PASAT036-21	DZMB-HH 8023	BOLD:ACZ6441			MZ655882	Paralicella tenuipes	Deutsches Zentrum fuer Marine Biodiversitaetsforschung	present study	Alicellidae	Paralicella	Paralicella tenuipes		Saskia Brix	21-Jul-2009	Atlantic Ocean	SAtl	Brazilian Basin		Area 02	-26.553	-35.188	4480	baited trap	542/1
PASAT	PASAT035-21	DZMB-HH 8022	BOLD:ACZ6441		MZ655965	MZ655886	Paralicella tenuipes	Deutsches Zentrum fuer Marine Biodiversitaetsforschung	present study	Alicellidae	Paralicella	Paralicella tenuipes		Saskia Brix	21-Jul-2009	Atlantic Ocean	SAtl	Brazilian Basin		Area 02	-26.553	-35.188	4480	baited trap	542/1
PASAT	PASAT034-21	DZMB-HH 8021	BOLD:ACZ6441		MZ655943	MZ655853	Paralicella tenuipes	Deutsches Zentrum fuer Marine Biodiversitaetsforschung	present study	Alicellidae	Paralicella	Paralicella tenuipes		Saskia Brix	21-Jul-2009	Atlantic Ocean	SAtl	Brazilian Basin		Area 02	-26.553	-35.188	4480	baited trap	542/1
PASAT	PASAT033-21	DZMB-HH 8020	BOLD:ACZ6235		MZ655947	MZ655863	Paralicella tenuipes	Deutsches Zentrum fuer Marine Biodiversitaetsforschung	present study	Alicellidae	Paralicella	Paralicella tenuipes		Saskia Brix	21-Jul-2009	Atlantic Ocean	SAtl	Brazilian Basin		Area 02	-26.553	-35.188	4480	baited trap	542/1
PASAT	PASAT032-21	DZMB-HH 8019	BOLD:ACZ6441		MZ655957	MZ655870	Paralicella tenuipes	Deutsches Zentrum fuer Marine Biodiversitaetsforschung	present study	Alicellidae	Paralicella	Paralicella tenuipes		Saskia Brix	21-Jul-2009	Atlantic Ocean	SAtl	Brazilian Basin		Area 02	-26.553	-35.188	4480	baited trap	542/1
PASAT	PASAT031-21	DZMB-HH 8018	BOLD:ACZ6441		MZ655959	MZ655876	Paralicella tenuipes	Deutsches Zentrum fuer Marine Biodiversitaetsforschung	present study	Alicellidae	Paralicella	Paralicella tenuipes		Saskia Brix	21-Jul-2009	Atlantic Ocean	SAtl	Brazilian Basin		Area 02	-26.553	-35.188	4480	baited trap	542/1
PASAT	PASAT030-21	DZMB-HH 8017	BOLD:ACZ6441		MZ655936	MZ655845	Paralicella tenuipes	Deutsches Zentrum fuer Marine Biodiversitaetsforschung	present study	Alicellidae	Paralicella	Paralicella tenuipes		Saskia Brix	21-Jul-2009	Atlantic Ocean	SAtl	Brazilian Basin		Area 02	-26.553	-35.188	4480	baited trap	542/1
PASAT	PASAT029-21	DZMB-HH 8016	BOLD:ACZ6441		MZ655956	MZ655869	Paralicella tenuipes	Deutsches Zentrum fuer Marine Biodiversitaetsforschung	present study	Alicellidae	Paralicella	Paralicella tenuipes		Saskia Brix	21-Jul-2009	Atlantic Ocean	SAtl	Brazilian Basin		Area 02	-26.553	-35.188	4480	baited trap	542/1
PASAT	PASAT028-21	DZMB-HH 8015	BOLD:ACZ6237		MZ655933	MZ655843	Paralicella tenuipes	Deutsches Zentrum fuer Marine Biodiversitaetsforschung	present study	Alicellidae	Paralicella	Paralicella tenuipes		Saskia Brix	21-Jul-2009	Atlantic Ocean	SAtl	Brazilian Basin		Area 02	-26.553	-35.188	4480	baited trap	542/1
PASAT	PASAT027-21	DZMB-HH 8014	BOLD:ACZ6237		MZ655950	MZ655865	Paralicella tenuipes	Deutsches Zentrum fuer Marine Biodiversitaetsforschung	present study	Alicellidae	Paralicella	Paralicella tenuipes		Saskia Brix	21-Jul-2009	Atlantic Ocean	SAtl	Brazilian Basin		Area 02	-26.553	-35.188	4480	baited trap	542/1
PASAT	PASAT026-21	DZMB-HH 8013	BOLD:ACZ6237		MZ655960	MZ655877	Paralicella tenuipes	Deutsches Zentrum fuer Marine Biodiversitaetsforschung	present study	Alicellidae	Paralicella	Paralicella tenuipes		Saskia Brix	21-Jul-2009	Atlantic Ocean	SAtl	Brazilian Basin		Area 02	-26.553	-35.188	4480	baited trap	542/1
PASAT	PASAT025-21	DZMB-HH 8012	BOLD:ACZ6441		MZ655938	MZ655848	Paralicella tenuipes	Deutsches Zentrum fuer Marine Biodiversitaetsforschung	present study	Alicellidae	Paralicella	Paralicella tenuipes		Saskia Brix	21-Jul-2009	Atlantic Ocean	SAtl	Brazilian Basin		Area 02	-26.553	-35.188	4480	baited trap	542/1
PASAT	PASAT024-21	DZMB-HH 8011	BOLD:ACZ6237		MZ655962	MZ655879	Paralicella tenuipes	Deutsches Zentrum fuer Marine Biodiversitaetsforschung	present study	Alicellidae	Paralicella	Paralicella tenuipes		Saskia Brix	21-Jul-2009	Atlantic Ocean	SAtl	Brazilian Basin		Area 02	-26.553	-35.188	4480	baited trap	542/1
PASAT	PASAT023-21	DZMB-HH 7974	BOLD:ACZ5625		MZ655952	MZ655867	Paralicella caperesca	Deutsches Zentrum fuer Marine Biodiversitaetsforschung	present study	Alicellidae	Paralicella	Paralicella caperesca		Saskia Brix	21-Jul-2009	Atlantic Ocean	SAtl	Brazilian Basin		Area 02	-26.553	-35.188	4480	baited trap	542/1
PASAT	PASAT022-21	DZMB-HH 7973	BOLD:ACZ5625		MZ655915	MZ655820	Paralicella caperesca	Deutsches Zentrum fuer Marine Biodiversitaetsforschung	present study	Alicellidae	Paralicella	Paralicella caperesca		Saskia Brix	21-Jul-2009	Atlantic Ocean	SAtl	Brazilian Basin		Area 02	-26.553	-35.188	4480	baited trap	542/1
PASAT	PASAT021-21	DZMB-HH 7972	BOLD:ACZ5625		MZ655951	MZ655866	Paralicella caperesca	Deutsches Zentrum fuer Marine Biodiversitaetsforschung	present study	Alicellidae	Paralicella	Paralicella caperesca		Saskia Brix	21-Jul-2009	Atlantic Ocean	SAtl	Brazilian Basin		Area 02	-26.553	-35.188	4480	baited trap	542/1
PASAT	PASAT019-21	DZMB-HH 7970	BOLD:ACZ5625		MZ655944	MZ655854	Paralicella caperesca	Deutsches Zentrum fuer Marine Biodiversitaetsforschung	present study	Alicellidae	Paralicella	Paralicella caperesca		Saskia Brix	21-Jul-2009	Atlantic Ocean	SAtl	Brazilian Basin		Area 02	-26.553	-35.188	4480	baited trap	542/1
PASAT	PASAT018-21	DZMB-HH 7969	BOLD:ACZ5625			MZ655872	Paralicella caperesca	Deutsches Zentrum fuer Marine Biodiversitaetsforschung	present study	Alicellidae	Paralicella	Paralicella caperesca		Saskia Brix	21-Jul-2009	Atlantic Ocean	SAtl	Brazilian Basin		Area 02	-26.553	-35.188	4480	baited trap	542/1
PASAT	PASAT017-21	DZMB-HH 7968	BOLD:ACZ5625		MZ655918	MZ655824	Paralicella caperesca	Deutsches Zentrum fuer Marine Biodiversitaetsforschung	present study	Alicellidae	Paralicella	Paralicella caperesca		Saskia Brix	21-Jul-2009	Atlantic Ocean	SAtl	Brazilian Basin		Area 02	-26.553	-35.188	4480	baited trap	542/1
PASAT	PASAT016-21	DZMB-HH 7967	BOLD:ACZ5625		MZ655945	MZ655855	Paralicella caperesca	Deutsches Zentrum fuer Marine Biodiversitaetsforschung	present study	Alicellidae	Paralicella	Paralicella caperesca		Saskia Brix	21-Jul-2009	Atlantic Ocean	SAtl	Brazilian Basin		Area 02	-26.553	-35.188	4480	baited trap	542/1
PASAT	PASAT014-21	DZMB-HH 7965	BOLD:ACZ5625		MZ655928	MZ655836	Paralicella caperesca	Deutsches Zentrum fuer Marine Biodiversitaetsforschung	present study	Alicellidae	Paralicella	Paralicella caperesca		Saskia Brix	21-Jul-2009	Atlantic Ocean	SAtl	Brazilian Basin		Area 02	-26.553	-35.188	4480	baited trap	542/1
NATPA	NATPA011-21	NOC_DISCOLL_DY103_10_Pten_11	BOLD:ACZ6441			MZ655840	Paralicella tenuipes	National Oceanography Center, Southampton	present study	Alicellidae	Paralicella	Paralicella tenuipes			29-Jun-2019	Atlantic Ocean	NAtl	Porcupine Abyssal Plain			48.943	-16.485	4846	baited trap	DY103#10
NATPA	NATPA010-21	NOC_DISCOLL_DY103_10_Pten_10	BOLD:ACZ6237			MZ655889	Paralicella tenuipes	National Oceanography Center, Southampton	present study	Alicellidae	Paralicella	Paralicella tenuipes			29-Jun-2019	Atlantic Ocean	NAtl	Porcupine Abyssal Plain			48.943	-16.485	4846	baited trap	DY103#10
NATPA	NATPA009-21	NOC_DISCOLL_DY103_10_Pten_9	BOLD:ACZ6237	MZ655894	MZ655923	MZ655832	Paralicella tenuipes	National Oceanography Center, Southampton	present study	Alicellidae	Paralicella	Paralicella tenuipes			29-Jun-2019	Atlantic Ocean	NAtl	Porcupine Abyssal Plain			48.943	-16.485	4846	baited trap	DY103#10
NATPA	NATPA008-21	NOC_DISCOLL_JC165_22_Pten_8	BOLD:ACZ6441			MZ655847	Paralicella tenuipes	National Oceanography Center, Southampton	present study	Alicellidae	Paralicella	Paralicella tenuipes			27-May-2018	Atlantic Ocean	NAtl	Porcupine Abyssal Plain			49.005	-16.471	4848	baited trap	JC165#22
NATPA	NATPA007-21	NOC_DISCOLL_JC165_22_Pten_7	BOLD:ACZ6441			MZ655825	Paralicella tenuipes	National Oceanography Center, Southampton	present study	Alicellidae	Paralicella	Paralicella tenuipes			27-May-2018	Atlantic Ocean	NAtl	Porcupine Abyssal Plain			49.005	-16.471	4848	baited trap	JC165#22
NATPA	NATPA006-21	NOC_DISCOLL_JC165_22_Pten_6	BOLD:ACZ6237	MZ655898	MZ655931	MZ655839	Paralicella tenuipes	National Oceanography Center, Southampton	present study	Alicellidae	Paralicella	Paralicella tenuipes			27-May-2018	Atlantic Ocean	NAtl	Porcupine Abyssal Plain			49.005	-16.471	4848	baited trap	JC165#22
NATPA	NATPA005-21	NOC_DISCOLL_JC165_22_Pten_5	BOLD:ACZ6441			MZ655859	Paralicella tenuipes	National Oceanography Center, Southampton	present study	Alicellidae	Paralicella	Paralicella tenuipes			27-May-2018	Atlantic Ocean	NAtl	Porcupine Abyssal Plain			49.005	-16.471	4848	baited trap	JC165#22
NATPA	NATPA004-21	NOC_DISCOLL_JC165_22_Pten_4	BOLD:ACZ6441			MZ655834	Paralicella tenuipes	National Oceanography Center, Southampton	present study	Alicellidae	Paralicella	Paralicella tenuipes			27-May-2018	Atlantic Ocean	NAtl	Porcupine Abyssal Plain			49.005	-16.471	4848	baited trap	JC165#22
NATPA	NATPA003-21	NOC_DISCOLL_JC165_22_Pten_3	BOLD:ACZ6441			MZ655881	Paralicella tenuipes	National Oceanography Center, Southampton	present study	Alicellidae	Paralicella	Paralicella tenuipes			27-May-2018	Atlantic Ocean	NAtl	Porcupine Abyssal Plain			49.005	-16.471	4848	baited trap	JC165#22
NATPA	NATPA002-21	NOC_DISCOLL_JC165_22_Pten_2	BOLD:ACZ6441			MZ655887	Paralicella tenuipes	National Oceanography Center, Southampton	present study	Alicellidae	Paralicella	Paralicella tenuipes			27-May-2018	Atlantic Ocean	NAtl	Porcupine Abyssal Plain			49.005	-16.471	4848	baited trap	JC165#22
NATPA	NATPA001-21	NOC_DISCOLL_JC165_22_Pten_1	BOLD:ACZ6235	MZ655899	MZ655932	MZ655842	Paralicella tenuipes	National Oceanography Center, Southampton	present study	Alicellidae	Paralicella	Paralicella tenuipes			27-May-2018	Atlantic Ocean	NAtl	Porcupine Abyssal Plain			49.005	-16.471	4848	baited trap	JC165#22
NATPA	NATPA032-21	NOC_DISCOLL_DY103_10_Pcap_16	BOLD:ACZ4489	MZ655893	MZ655922	MZ655831	Paralicella caperesca	National Oceanography Center, Southampton	present study	Alicellidae	Paralicella	Paralicella caperesca			29-Jun-2019	Atlantic Ocean	NAtl	Porcupine Abyssal Plain			48.943	-16.485	4846	baited trap	DY103#10
NATPA	NATPA031-21	NOC_DISCOLL_DY103_10_Pcap_15	BOLD:ACZ5627			MZ655822	Paralicella caperesca	National Oceanography Center, Southampton	present study	Alicellidae	Paralicella	Paralicella caperesca			29-Jun-2019	Atlantic Ocean	NAtl	Porcupine Abyssal Plain			48.943	-16.485	4846	baited trap	DY103#10
NATPA	NATPA030-21	NOC_DISCOLL_DY103_10_Pcap_14	BOLD:AEH6662	MZ655895	MZ655924	MZ655833	Paralicella caperesca	National Oceanography Center, Southampton	present study	Alicellidae	Paralicella	Paralicella caperesca			29-Jun-2019	Atlantic Ocean	NAtl	Porcupine Abyssal Plain			48.943	-16.485	4846	baited trap	DY103#10
NATPA	NATPA029-21	NOC_DISCOLL_DY103_10_Pcap_13	BOLD:ACZ5625			MZ655864	Paralicella caperesca	National Oceanography Center, Southampton	present study	Alicellidae	Paralicella	Paralicella caperesca			29-Jun-2019	Atlantic Ocean	NAtl	Porcupine Abyssal Plain			48.943	-16.485	4846	baited trap	DY103#10
NATPA	NATPA028-21	NOC_DISCOLL_DY103_10_Pcap_12	BOLD:ACZ4489			MZ655857	Paralicella caperesca	National Oceanography Center, Southampton	present study	Alicellidae	Paralicella	Paralicella caperesca			29-Jun-2019	Atlantic Ocean	NAtl	Porcupine Abyssal Plain			48.943	-16.485	4846	baited trap	DY103#10
NATPA	NATPA027-21	NOC_DISCOLL_DY103_10_Pcap_11	BOLD:ACZ4489			MZ655868	Paralicella caperesca	National Oceanography Center, Southampton	present study	Alicellidae	Paralicella	Paralicella caperesca			29-Jun-2019	Atlantic Ocean	NAtl	Porcupine Abyssal Plain			48.943	-16.485	4846	baited trap	DY103#10
NATPA	NATPA026-21	NOC_DISCOLL_DY103_10_Pcap_10	BOLD:ACZ4489			MZ655849	Paralicella caperesca	National Oceanography Center, Southampton	present study	Alicellidae	Paralicella	Paralicella caperesca			29-Jun-2019	Atlantic Ocean	NAtl	Porcupine Abyssal Plain			48.943	-16.485	4846	baited trap	DY103#10
NATPA	NATPA025-21	NOC_DISCOLL_DY103_10_Pcap_9	BOLD:ACZ4489			MZ655835	Paralicella caperesca	National Oceanography Center, Southampton	present study	Alicellidae	Paralicella	Paralicella caperesca			29-Jun-2019	Atlantic Ocean	NAtl	Porcupine Abyssal Plain			48.943	-16.485	4846	baited trap	DY103#10
NATPA	NATPA024-21	NOC_DISCOLL_JC165_22_Pcap_8	BOLD:ACZ4489			MZ655858	Paralicella caperesca	National Oceanography Center, Southampton	present study	Alicellidae	Paralicella	Paralicella caperesca			27-May-2018	Atlantic Ocean	NAtl	Porcupine Abyssal Plain			49.005	-16.471	4848	baited trap	JC165#22
NATPA	NATPA023-21	NOC_DISCOLL_JC165_22_Pcap_7	BOLD:ACZ4489			MZ655873	Paralicella caperesca	National Oceanography Center, Southampton	present study	Alicellidae	Paralicella	Paralicella caperesca			27-May-2018	Atlantic Ocean	NAtl	Porcupine Abyssal Plain			49.005	-16.471	4848	baited trap	JC165#22
NATPA	NATPA021-21	NOC_DISCOLL_JC165_22_Pcap_5	BOLD:ACZ5625			MZ655861	Paralicella caperesca	National Oceanography Center, Southampton	present study	Alicellidae	Paralicella	Paralicella caperesca			27-May-2018	Atlantic Ocean	NAtl	Porcupine Abyssal Plain			49.005	-16.471	4848	baited trap	JC165#22
NATPA	NATPA020-21	NOC_DISCOLL_JC165_22_Pcap_4	BOLD:ACZ5625			MZ655851	Paralicella caperesca	National Oceanography Center, Southampton	present study	Alicellidae	Paralicella	Paralicella caperesca			27-May-2018	Atlantic Ocean	NAtl	Porcupine Abyssal Plain			49.005	-16.471	4848	baited trap	JC165#22
NATPA	NATPA019-21	NOC_DISCOLL_JC165_22_Pcap_3	BOLD:ACZ5625			MZ655821	Paralicella caperesca	National Oceanography Center, Southampton	present study	Alicellidae	Paralicella	Paralicella caperesca			27-May-2018	Atlantic Ocean	NAtl	Porcupine Abyssal Plain			49.005	-16.471	4848	baited trap	JC165#22
NATPA	NATPA018-21	NOC_DISCOLL_JC165_22_Pcap_2	BOLD:ACZ5627			MZ655888	Paralicella caperesca	National Oceanography Center, Southampton	present study	Alicellidae	Paralicella	Paralicella caperesca			27-May-2018	Atlantic Ocean	NAtl	Porcupine Abyssal Plain			49.005	-16.471	4848	baited trap	JC165#22
NATPA	NATPA017-21	NOC_DISCOLL_JC165_22_Pcap_1	BOLD:ACZ5625	MZ655908	MZ655958	MZ655875	Paralicella caperesca	National Oceanography Center, Southampton	present study	Alicellidae	Paralicella	Paralicella caperesca			27-May-2018	Atlantic Ocean	NAtl	Porcupine Abyssal Plain			49.005	-16.471	4848	baited trap	JC165#22
NATPA	NATPA016-21	NOC_DISCOLL_DY103_10_Pten_16	BOLD:ACZ6235			MZ655826	Paralicella tenuipes	National Oceanography Center, Southampton	present study	Alicellidae	Paralicella	Paralicella tenuipes			29-Jun-2019	Atlantic Ocean	NAtl	Porcupine Abyssal Plain			48.943	-16.485	4846	baited trap	DY103#10
NATPA	NATPA015-21	NOC_DISCOLL_DY103_10_Pten_15	BOLD:ACZ6441			MZ655874	Paralicella tenuipes	National Oceanography Center, Southampton	present study	Alicellidae	Paralicella	Paralicella tenuipes			29-Jun-2019	Atlantic Ocean	NAtl	Porcupine Abyssal Plain			48.943	-16.485	4846	baited trap	DY103#10
NATPA	NATPA013-21	NOC_DISCOLL_DY103_10_Pten_13	BOLD:ACZ6441			MZ655878	Paralicella tenuipes	National Oceanography Center, Southampton	present study	Alicellidae	Paralicella	Paralicella tenuipes			29-Jun-2019	Atlantic Ocean	NAtl	Porcupine Abyssal Plain			48.943	-16.485	4846	baited trap	DY103#10
NATPA	NATPA012-21	NOC_DISCOLL_DY103_10_Pten_12	BOLD:ACZ6441			MZ655871	Paralicella tenuipes	National Oceanography Center, Southampton	present study	Alicellidae	Paralicella	Paralicella tenuipes			29-Jun-2019	Atlantic Ocean	NAtl	Porcupine Abyssal Plain			48.943	-16.485	4846	baited trap	DY103#10
SCAP	SCAP612-16	AB2-AMP1620	BOLD:ACZ5625			MW056776	Paralicella caperesca	Deutsches Zentrum fuer Marine Biodiversitaetsforschung	Mohrbeck et al. 2021	Alicellidae	Paralicella	Paralicella caperesca		Clifton Nunnally	21-Feb-2015	Pacific Ocean	CP	Clarion Clipperton Zone	UK-1 exploration area	Stratum B	12.563	-116.717	4193	Baited trap	UK-1 Stratum B
SCAP	SCAP609-16	AB2-AMP1616	BOLD:ACZ5625			MW056795	Paralicella caperesca	Deutsches Zentrum fuer Marine Biodiversitaetsforschung	Mohrbeck et al. 2021	Alicellidae	Paralicella	Paralicella caperesca		Clifton Nunnally	21-Feb-2015	Pacific Ocean	CP	Clarion Clipperton Zone	UK-1 exploration area	Stratum B	12.563	-116.717	4193	Baited trap	UK-1 Stratum B
SCAP	SCAP597-16	AB2-AMP1595	BOLD:ACZ5629			MW056597	Paralicella caperesca	Deutsches Zentrum fuer Marine Biodiversitaetsforschung	Mohrbeck et al. 2021	Alicellidae	Paralicella	Paralicella caperesca		Clifton Nunnally	21-Feb-2015	Pacific Ocean	CP	Clarion Clipperton Zone	UK-1 exploration area	Stratum B	12.563	-116.717	4193	Baited trap	UK-1 Stratum B
SCAP	SCAP594-16	AB2-AMP1590	BOLD:ACZ5625			MW056819	Paralicella caperesca	Deutsches Zentrum fuer Marine Biodiversitaetsforschung	Mohrbeck et al. 2021	Alicellidae	Paralicella	Paralicella caperesca		Clifton Nunnally	21-Feb-2015	Pacific Ocean	CP	Clarion Clipperton Zone	UK-1 exploration area	Stratum B	12.563	-116.717	4193	Baited trap	UK-1 Stratum B
SCAP	SCAP591-16	AB2-AMP1584	BOLD:ACZ5628			MW057077	Paralicella caperesca	Deutsches Zentrum fuer Marine Biodiversitaetsforschung	Mohrbeck et al. 2021	Alicellidae	Paralicella	Paralicella caperesca		Clifton Nunnally	21-Feb-2015	Pacific Ocean	CP	Clarion Clipperton Zone	UK-1 exploration area	Stratum B	12.563	-116.717	4193	Baited trap	UK-1 Stratum B
SCAP	SCAP589-16	AB2-AMP1580	BOLD:ACZ5625			MW057043	Paralicella caperesca	Deutsches Zentrum fuer Marine Biodiversitaetsforschung	Mohrbeck et al. 2021	Alicellidae	Paralicella	Paralicella caperesca		Clifton Nunnally	21-Feb-2015	Pacific Ocean	CP	Clarion Clipperton Zone	UK-1 exploration area	Stratum B	12.563	-116.717	4193	Baited trap	UK-1 Stratum B
SCAP	SCAP586-16	AB2-AMP1573	BOLD:ACZ5625	MZ655892	MZ655920	MW056622	Paralicella caperesca	Deutsches Zentrum fuer Marine Biodiversitaetsforschung	Mohrbeck et al. 2021	Alicellidae	Paralicella	Paralicella caperesca		Clifton Nunnally	21-Feb-2015	Pacific Ocean	CP	Clarion Clipperton Zone	UK-1 exploration area	Stratum B	12.563	-116.717	4193	Baited trap	UK-1 Stratum B
SCAP	SCAP585-16	AB2-AMP1572	BOLD:ACZ5625			MW056654	Paralicella caperesca	Deutsches Zentrum fuer Marine Biodiversitaetsforschung	Mohrbeck et al. 2021	Alicellidae	Paralicella	Paralicella caperesca		Clifton Nunnally	21-Feb-2015	Pacific Ocean	CP	Clarion Clipperton Zone	UK-1 exploration area	Stratum B	12.563	-116.717	4193	Baited trap	UK-1 Stratum B
SCAP	SCAP582-16	AB2-AMP1567	BOLD:ACZ5625			MW056958	Paralicella caperesca	Deutsches Zentrum fuer Marine Biodiversitaetsforschung	Mohrbeck et al. 2021	Alicellidae	Paralicella	Paralicella caperesca		Clifton Nunnally	21-Feb-2015	Pacific Ocean	CP	Clarion Clipperton Zone	UK-1 exploration area	Stratum B	12.563	-116.717	4193	Baited trap	UK-1 Stratum B
SCAP	SCAP580-16	AB2-AMP1563	BOLD:ACZ5625			MW057012	Paralicella caperesca	Deutsches Zentrum fuer Marine Biodiversitaetsforschung	Mohrbeck et al. 2021	Alicellidae	Paralicella	Paralicella caperesca		Clifton Nunnally	21-Feb-2015	Pacific Ocean	CP	Clarion Clipperton Zone	UK-1 exploration area	Stratum B	12.563	-116.717	4193	Baited trap	UK-1 Stratum B
SCAP	SCAP579-16	AB2-AMP1562	BOLD:ACZ4905	MZ655896	MZ655925	MW056663	Paralicella caperesca	Deutsches Zentrum fuer Marine Biodiversitaetsforschung	Mohrbeck et al. 2021	Alicellidae	Paralicella	Paralicella caperesca		Clifton Nunnally	21-Feb-2015	Pacific Ocean	CP	Clarion Clipperton Zone	UK-1 exploration area	Stratum B	12.563	-116.717	4193	Baited trap	UK-1 Stratum B
SCAP	SCAP578-16	AB2-AMP1560	BOLD:ACZ5625			MW056599	Paralicella caperesca	Deutsches Zentrum fuer Marine Biodiversitaetsforschung	Mohrbeck et al. 2021	Alicellidae	Paralicella	Paralicella caperesca		Clifton Nunnally	21-Feb-2015	Pacific Ocean	CP	Clarion Clipperton Zone	UK-1 exploration area	Stratum B	12.563	-116.717	4193	Baited trap	UK-1 Stratum B
SCAP	SCAP567-16	AB2-AMP1542	BOLD:ACZ4904	MZ655900	MZ655939	MW056769	Paralicella caperesca	Deutsches Zentrum fuer Marine Biodiversitaetsforschung	Mohrbeck et al. 2021	Alicellidae	Paralicella	Paralicella caperesca		Clifton Nunnally	21-Feb-2015	Pacific Ocean	CP	Clarion Clipperton Zone	UK-1 exploration area	Stratum B	12.563	-116.717	4193	Baited trap	UK-1 Stratum B
SCAP	SCAP411-16	AB1-AMP593	BOLD:ACZ5627			MW056802	Paralicella caperesca	National Oceanography Center, Southampton	Mohrbeck et al. 2021	Alicellidae	Paralicella	Paralicella caperesca		Jeffrey Drazen, Clifton Nunnally	10-Oct-2013	Pacific Ocean	CP	northeast equatorial|Clarion Clipperton Zone	UK-1 lease block	Stratum A	13.85	-116.623	4082	Baited trap	B
SCAP	SCAP562-16	AB2-AMP765	BOLD:ACZ5629			MW056951	Paralicella caperesca	Deutsches Zentrum fuer Marine Biodiversitaetsforschung	Mohrbeck et al. 2021	Alicellidae	Paralicella	Paralicella caperesca		Clifton Nunnally	18-Feb-2015	Pacific Ocean	CP	Clarion Clipperton Zone	UK-1 exploration area	Stratum B	12.384	-116.491	4149	Baited trap	UK-1 Stratum B
SCAP	SCAP561-16	AB2-AMP764	BOLD:ACZ5629			MW057104	Paralicella caperesca	Deutsches Zentrum fuer Marine Biodiversitaetsforschung	Mohrbeck et al. 2021	Alicellidae	Paralicella	Paralicella caperesca		Clifton Nunnally	18-Feb-2015	Pacific Ocean	CP	Clarion Clipperton Zone	UK-1 exploration area	Stratum B	12.384	-116.491	4149	Baited trap	UK-1 Stratum B
SCAP	SCAP559-16	AB2-AMP761	BOLD:ACZ5629			MW056843	Paralicella caperesca	Deutsches Zentrum fuer Marine Biodiversitaetsforschung	Mohrbeck et al. 2021	Alicellidae	Paralicella	Paralicella caperesca		Clifton Nunnally	18-Feb-2015	Pacific Ocean	CP	Clarion Clipperton Zone	UK-1 exploration area	Stratum B	12.384	-116.491	4149	Baited trap	UK-1 Stratum B
SCAP	SCAP459-16	AB1-AMP661	BOLD:ACZ4873			MW056554	Paralicella caperesca	Deutsches Zentrum fuer Marine Biodiversitaetsforschung	Mohrbeck et al. 2021	Alicellidae	Paralicella	Paralicella caperesca		Jeffrey Drazen, Clifton Nunnally	10-Oct-2013	Pacific Ocean	CP	northeast equatorial|Clarion Clipperton Zone	UK-1 lease block	Stratum A	13.85	-116.623	4082	Baited trap	B
SCAP	SCAP458-16	AB1-AMP660	BOLD:ACZ4489			MW056682	Paralicella caperesca	Deutsches Zentrum fuer Marine Biodiversitaetsforschung	Mohrbeck et al. 2021	Alicellidae	Paralicella	Paralicella caperesca		Jeffrey Drazen, Clifton Nunnally	10-Oct-2013	Pacific Ocean	CP	northeast equatorial|Clarion Clipperton Zone	UK-1 lease block	Stratum A	13.85	-116.623	4082	Baited trap	B
SCAP	SCAP457-16	AB1-AMP659	BOLD:ACZ5625			MW056782	Paralicella caperesca	Deutsches Zentrum fuer Marine Biodiversitaetsforschung	Mohrbeck et al. 2021	Alicellidae	Paralicella	Paralicella caperesca		Jeffrey Drazen, Clifton Nunnally	10-Oct-2013	Pacific Ocean	CP	northeast equatorial|Clarion Clipperton Zone	UK-1 lease block	Stratum A	13.85	-116.623	4082	Baited trap	B
SCAP	SCAP455-16	AB1-AMP657	BOLD:ACZ5625			MW056869	Paralicella caperesca	Deutsches Zentrum fuer Marine Biodiversitaetsforschung	Mohrbeck et al. 2021	Alicellidae	Paralicella	Paralicella caperesca		Jeffrey Drazen, Clifton Nunnally	10-Oct-2013	Pacific Ocean	CP	northeast equatorial|Clarion Clipperton Zone	UK-1 lease block	Stratum A	13.85	-116.623	4082	Baited trap	B
SCAP	SCAP553-16	AB2-AMP748	BOLD:ACZ5629			MW057054	Paralicella caperesca	Deutsches Zentrum fuer Marine Biodiversitaetsforschung	Mohrbeck et al. 2021	Alicellidae	Paralicella	Paralicella caperesca		Clifton Nunnally	18-Feb-2015	Pacific Ocean	CP	Clarion Clipperton Zone	UK-1 exploration area	Stratum B	12.384	-116.491	4149	Baited trap	UK-1 Stratum B
SCAP	SCAP552-16	AB2-AMP747	BOLD:ACZ5625			MW057096	Paralicella caperesca	Deutsches Zentrum fuer Marine Biodiversitaetsforschung	Mohrbeck et al. 2021	Alicellidae	Paralicella	Paralicella caperesca		Clifton Nunnally	18-Feb-2015	Pacific Ocean	CP	Clarion Clipperton Zone	UK-1 exploration area	Stratum B	12.384	-116.491	4149	Baited trap	UK-1 Stratum B
SCAP	SCAP551-16	AB2-AMP744	BOLD:ACZ4905			MW056520	Paralicella caperesca	Deutsches Zentrum fuer Marine Biodiversitaetsforschung	Mohrbeck et al. 2021	Alicellidae	Paralicella	Paralicella caperesca		Clifton Nunnally	18-Feb-2015	Pacific Ocean	CP	Clarion Clipperton Zone	UK-1 exploration area	Stratum B	12.384	-116.491	4149	Baited trap	UK-1 Stratum B
SCAP	SCAP550-16	AB2-AMP743	BOLD:ACZ5625			MW056543	Paralicella caperesca	Deutsches Zentrum fuer Marine Biodiversitaetsforschung	Mohrbeck et al. 2021	Alicellidae	Paralicella	Paralicella caperesca		Clifton Nunnally	18-Feb-2015	Pacific Ocean	CP	Clarion Clipperton Zone	UK-1 exploration area	Stratum B	12.384	-116.491	4149	Baited trap	UK-1 Stratum B
SCAP	SCAP549-16	AB2-AMP742	BOLD:ACZ5629			MW056526	Paralicella caperesca	Deutsches Zentrum fuer Marine Biodiversitaetsforschung	Mohrbeck et al. 2021	Alicellidae	Paralicella	Paralicella caperesca		Clifton Nunnally	18-Feb-2015	Pacific Ocean	CP	Clarion Clipperton Zone	UK-1 exploration area	Stratum B	12.384	-116.491	4149	Baited trap	UK-1 Stratum B
SCAP	SCAP548-16	AB2-AMP738	BOLD:ACZ5629			MW056939	Paralicella caperesca	Deutsches Zentrum fuer Marine Biodiversitaetsforschung	Mohrbeck et al. 2021	Alicellidae	Paralicella	Paralicella caperesca		Clifton Nunnally	18-Feb-2015	Pacific Ocean	CP	Clarion Clipperton Zone	UK-1 exploration area	Stratum B	12.384	-116.491	4149	Baited trap	UK-1 Stratum B
SCAP	SCAP546-16	AB2-AMP733	BOLD:ACZ5629			MW056671	Paralicella caperesca	Deutsches Zentrum fuer Marine Biodiversitaetsforschung	Mohrbeck et al. 2021	Alicellidae	Paralicella	Paralicella caperesca		Clifton Nunnally	18-Feb-2015	Pacific Ocean	CP	Clarion Clipperton Zone	UK-1 exploration area	Stratum B	12.384	-116.491	4149	Baited trap	UK-1 Stratum B
SCAP	SCAP030-16	AB1-AMP36	BOLD:ACZ4489			MW057134	Paralicella caperesca	Deutsches Zentrum fuer Marine Biodiversitaetsforschung	Mohrbeck et al. 2021	Alicellidae	Paralicella	Paralicella caperesca		Jeffrey Drazen, Clifton Nunnally	08-Oct-2013	Pacific Ocean	CP	northeast equatorial|Clarion Clipperton Zone	UK-1 lease block	Stratum A	13.881	-116.449	4203	Baited trap	A
SCAP	SCAP640-16	AB2-AMP2276	BOLD:ACZ5629			MW057021	Paralicella caperesca	Deutsches Zentrum fuer Marine Biodiversitaetsforschung	Mohrbeck et al. 2021	Alicellidae	Paralicella	Paralicella caperesca		Clifton Nunnally	24-Feb-2015	Pacific Ocean	CP	Clarion Clipperton Zone	OMS-1 exploration area	Stratum A	12.118	-117.35	4183	Baited trap	OMS-1 Stratum A
SCAP	SCAP022-16	AB1-AMP28	BOLD:ACZ4489			MW056987	Paralicella caperesca	Deutsches Zentrum fuer Marine Biodiversitaetsforschung	Mohrbeck et al. 2021	Alicellidae	Paralicella	Paralicella caperesca		Jeffrey Drazen, Clifton Nunnally	08-Oct-2013	Pacific Ocean	CP	northeast equatorial|Clarion Clipperton Zone	UK-1 lease block	Stratum A	13.881	-116.449	4203	Baited trap	A
SCAP	SCAP632-16	AB2-AMP2255	BOLD:ACZ5625			MW057106	Paralicella caperesca	Deutsches Zentrum fuer Marine Biodiversitaetsforschung	Mohrbeck et al. 2021	Alicellidae	Paralicella	Paralicella caperesca		Clifton Nunnally	24-Feb-2015	Pacific Ocean	CP	Clarion Clipperton Zone	OMS-1 exploration area	Stratum A	12.118	-117.35	4183	Baited trap	OMS-1 Stratum A
SCAP	SCAP018-16	AB1-AMP22	BOLD:ACZ5625			MW056688	Paralicella caperesca	Deutsches Zentrum fuer Marine Biodiversitaetsforschung	Mohrbeck et al. 2021	Alicellidae	Paralicella	Paralicella caperesca		Jeffrey Drazen, Clifton Nunnally	08-Oct-2013	Pacific Ocean	CP	northeast equatorial|Clarion Clipperton Zone	UK-1 lease block	Stratum A	13.881	-116.449	4203	Baited trap	A
SCAP	SCAP017-16	AB1-AMP19	BOLD:ACZ5625			MW056614	Paralicella caperesca	National Oceanography Center, Southampton	Mohrbeck et al. 2021	Alicellidae	Paralicella	Paralicella caperesca		Jeffrey Drazen, Clifton Nunnally	08-Oct-2013	Pacific Ocean	CP	northeast equatorial|Clarion Clipperton Zone	UK-1 lease block	Stratum A	13.881	-116.449	4203	Baited trap	A
SCAP	SCAP016-16	AB1-AMP18	BOLD:ACZ5631	MZ655891	MZ655916	MW056551	Paralicella caperesca	National Oceanography Center, Southampton	Mohrbeck et al. 2021	Alicellidae	Paralicella	Paralicella caperesca		Jeffrey Drazen, Clifton Nunnally	08-Oct-2013	Pacific Ocean	CP	northeast equatorial|Clarion Clipperton Zone	UK-1 lease block	Stratum A	13.881	-116.449	4203	Baited trap	A
SCAP	SCAP015-16	AB1-AMP16	BOLD:ACZ5628	MZ655890	MZ655914	MW056530	Paralicella caperesca	National Oceanography Center, Southampton	Mohrbeck et al. 2021	Alicellidae	Paralicella	Paralicella caperesca		Jeffrey Drazen, Clifton Nunnally	08-Oct-2013	Pacific Ocean	CP	northeast equatorial|Clarion Clipperton Zone	UK-1 lease block	Stratum A	13.881	-116.449	4203	Baited trap	A
SCAP	SCAP012-16	AB1-AMP12	BOLD:ACZ5625			MW056913	Paralicella caperesca	National Oceanography Center, Southampton	Mohrbeck et al. 2021	Alicellidae	Paralicella	Paralicella caperesca		Jeffrey Drazen, Clifton Nunnally	08-Oct-2013	Pacific Ocean	CP	northeast equatorial|Clarion Clipperton Zone	UK-1 lease block	Stratum A	13.881	-116.449	4203	Baited trap	A
SCAP	SCAP622-16	AB2-AMP2227	BOLD:ACZ5625			MW056804	Paralicella caperesca	Deutsches Zentrum fuer Marine Biodiversitaetsforschung	Mohrbeck et al. 2021	Alicellidae	Paralicella	Paralicella caperesca		Clifton Nunnally	24-Feb-2015	Pacific Ocean	CP	Clarion Clipperton Zone	OMS-1 exploration area	Stratum A	12.118	-117.35	4183	Baited trap	OMS-1 Stratum A
SCAP	SCAP613-16	AB2-AMP1624	BOLD:ACZ5625			MW057129	Paralicella caperesca	Deutsches Zentrum fuer Marine Biodiversitaetsforschung	Mohrbeck et al. 2021	Alicellidae	Paralicella	Paralicella caperesca		Clifton Nunnally	21-Feb-2015	Pacific Ocean	CP	Clarion Clipperton Zone	UK-1 exploration area	Stratum B	12.563	-116.717	4193	Baited trap	UK-1 Stratum B
SCAP	SCAP611-16	AB2-AMP1619	BOLD:ACZ6237			MW056803	Paralicella tenuipes	Deutsches Zentrum fuer Marine Biodiversitaetsforschung	Mohrbeck et al. 2021	Alicellidae	Paralicella	Paralicella tenuipes		Clifton Nunnally	21-Feb-2015	Pacific Ocean	CP	Clarion Clipperton Zone	UK-1 exploration area	Stratum B	12.563	-116.717	4193	Baited trap	UK-1 Stratum B
SCAP	SCAP608-16	AB2-AMP1614	BOLD:ACZ6441			MW056767	Paralicella tenuipes	Deutsches Zentrum fuer Marine Biodiversitaetsforschung	Mohrbeck et al. 2021	Alicellidae	Paralicella	Paralicella tenuipes		Clifton Nunnally	21-Feb-2015	Pacific Ocean	CP	Clarion Clipperton Zone	UK-1 exploration area	Stratum B	12.563	-116.717	4193	Baited trap	UK-1 Stratum B
SCAP	SCAP607-16	AB2-AMP1613	BOLD:ACZ6441			MW056998	Paralicella tenuipes	Deutsches Zentrum fuer Marine Biodiversitaetsforschung	Mohrbeck et al. 2021	Alicellidae	Paralicella	Paralicella tenuipes		Clifton Nunnally	21-Feb-2015	Pacific Ocean	CP	Clarion Clipperton Zone	UK-1 exploration area	Stratum B	12.563	-116.717	4193	Baited trap	UK-1 Stratum B
SCAP	SCAP606-16	AB2-AMP1606	BOLD:ACZ6236			MW056890	Paralicella tenuipes	Deutsches Zentrum fuer Marine Biodiversitaetsforschung	Mohrbeck et al. 2021	Alicellidae	Paralicella	Paralicella tenuipes		Clifton Nunnally	21-Feb-2015	Pacific Ocean	CP	Clarion Clipperton Zone	UK-1 exploration area	Stratum B	12.563	-116.717	4193	Baited trap	UK-1 Stratum B
SCAP	SCAP605-16	AB2-AMP1605	BOLD:ACZ6237			MW056679	Paralicella tenuipes	Deutsches Zentrum fuer Marine Biodiversitaetsforschung	Mohrbeck et al. 2021	Alicellidae	Paralicella	Paralicella tenuipes		Clifton Nunnally	21-Feb-2015	Pacific Ocean	CP	Clarion Clipperton Zone	UK-1 exploration area	Stratum B	12.563	-116.717	4193	Baited trap	UK-1 Stratum B
SCAP	SCAP604-16	AB2-AMP1604	BOLD:ACZ6237			MW056575	Paralicella tenuipes	Deutsches Zentrum fuer Marine Biodiversitaetsforschung	Mohrbeck et al. 2021	Alicellidae	Paralicella	Paralicella tenuipes		Clifton Nunnally	21-Feb-2015	Pacific Ocean	CP	Clarion Clipperton Zone	UK-1 exploration area	Stratum B	12.563	-116.717	4193	Baited trap	UK-1 Stratum B
SCAP	SCAP603-16	AB2-AMP1602	BOLD:ACZ6441			MW056874	Paralicella tenuipes	Deutsches Zentrum fuer Marine Biodiversitaetsforschung	Mohrbeck et al. 2021	Alicellidae	Paralicella	Paralicella tenuipes		Clifton Nunnally	21-Feb-2015	Pacific Ocean	CP	Clarion Clipperton Zone	UK-1 exploration area	Stratum B	12.563	-116.717	4193	Baited trap	UK-1 Stratum B
SCAP	SCAP601-16	AB2-AMP1600	BOLD:ACZ6441			MW056971	Paralicella tenuipes	Deutsches Zentrum fuer Marine Biodiversitaetsforschung	Mohrbeck et al. 2021	Alicellidae	Paralicella	Paralicella tenuipes		Clifton Nunnally	21-Feb-2015	Pacific Ocean	CP	Clarion Clipperton Zone	UK-1 exploration area	Stratum B	12.563	-116.717	4193	Baited trap	UK-1 Stratum B
SCAP	SCAP696-16	AB2-AMP3901	BOLD:ACZ6441			MW056532	Paralicella tenuipes	Deutsches Zentrum fuer Marine Biodiversitaetsforschung	Mohrbeck et al. 2021	Alicellidae	Paralicella	Paralicella tenuipes		Clifton Nunnally	20-Mar-2015	Pacific Ocean	CP	Clarion Clipperton Zone	Area of Particular Environmental Interest	Stratum A	19.451	-120.053	4057	Baited trap	APEI-4 Stratum A
SCAP	SCAP599-16	AB2-AMP1597	BOLD:ACZ6441			MW056631	Paralicella tenuipes	Deutsches Zentrum fuer Marine Biodiversitaetsforschung	Mohrbeck et al. 2021	Alicellidae	Paralicella	Paralicella tenuipes		Clifton Nunnally	21-Feb-2015	Pacific Ocean	CP	Clarion Clipperton Zone	UK-1 exploration area	Stratum B	12.563	-116.717	4193	Baited trap	UK-1 Stratum B
SCAP	SCAP596-16	AB2-AMP1594	BOLD:ACZ6237			MW056929	Paralicella tenuipes	Deutsches Zentrum fuer Marine Biodiversitaetsforschung	Mohrbeck et al. 2021	Alicellidae	Paralicella	Paralicella tenuipes		Clifton Nunnally	21-Feb-2015	Pacific Ocean	CP	Clarion Clipperton Zone	UK-1 exploration area	Stratum B	12.563	-116.717	4193	Baited trap	UK-1 Stratum B
SCAP	SCAP595-16	AB2-AMP1591	BOLD:ACZ6237			MW056807	Paralicella tenuipes	Deutsches Zentrum fuer Marine Biodiversitaetsforschung	Mohrbeck et al. 2021	Alicellidae	Paralicella	Paralicella tenuipes		Clifton Nunnally	21-Feb-2015	Pacific Ocean	CP	Clarion Clipperton Zone	UK-1 exploration area	Stratum B	12.563	-116.717	4193	Baited trap	UK-1 Stratum B
SCAP	SCAP593-16	AB2-AMP1589	BOLD:ACZ6441			MW056742	Paralicella tenuipes	Deutsches Zentrum fuer Marine Biodiversitaetsforschung	Mohrbeck et al. 2021	Alicellidae	Paralicella	Paralicella tenuipes		Clifton Nunnally	21-Feb-2015	Pacific Ocean	CP	Clarion Clipperton Zone	UK-1 exploration area	Stratum B	12.563	-116.717	4193	Baited trap	UK-1 Stratum B
SCAP	SCAP592-16	AB2-AMP1587	BOLD:ACZ6237			MW057095	Paralicella tenuipes	Deutsches Zentrum fuer Marine Biodiversitaetsforschung	Mohrbeck et al. 2021	Alicellidae	Paralicella	Paralicella tenuipes		Clifton Nunnally	21-Feb-2015	Pacific Ocean	CP	Clarion Clipperton Zone	UK-1 exploration area	Stratum B	12.563	-116.717	4193	Baited trap	UK-1 Stratum B
SCAP	SCAP588-16	AB2-AMP1578	BOLD:ACZ6441			MW057126	Paralicella tenuipes	Deutsches Zentrum fuer Marine Biodiversitaetsforschung	Mohrbeck et al. 2021	Alicellidae	Paralicella	Paralicella tenuipes		Clifton Nunnally	21-Feb-2015	Pacific Ocean	CP	Clarion Clipperton Zone	UK-1 exploration area	Stratum B	12.563	-116.717	4193	Baited trap	UK-1 Stratum B
SCAP	SCAP584-16	AB2-AMP1570	BOLD:ACZ6237			MW056772	Paralicella tenuipes	Deutsches Zentrum fuer Marine Biodiversitaetsforschung	Mohrbeck et al. 2021	Alicellidae	Paralicella	Paralicella tenuipes		Clifton Nunnally	21-Feb-2015	Pacific Ocean	CP	Clarion Clipperton Zone	UK-1 exploration area	Stratum B	12.563	-116.717	4193	Baited trap	UK-1 Stratum B
SCAP	SCAP583-16	AB2-AMP1568	BOLD:ACZ6441			MW057107	Paralicella tenuipes	Deutsches Zentrum fuer Marine Biodiversitaetsforschung	Mohrbeck et al. 2021	Alicellidae	Paralicella	Paralicella tenuipes		Clifton Nunnally	21-Feb-2015	Pacific Ocean	CP	Clarion Clipperton Zone	UK-1 exploration area	Stratum B	12.563	-116.717	4193	Baited trap	UK-1 Stratum B
SCAP	SCAP581-16	AB2-AMP1565	BOLD:ACZ6441			MW056985	Paralicella tenuipes	Deutsches Zentrum fuer Marine Biodiversitaetsforschung	Mohrbeck et al. 2021	Alicellidae	Paralicella	Paralicella tenuipes		Clifton Nunnally	21-Feb-2015	Pacific Ocean	CP	Clarion Clipperton Zone	UK-1 exploration area	Stratum B	12.563	-116.717	4193	Baited trap	UK-1 Stratum B
SCAP	SCAP577-16	AB2-AMP1559	BOLD:ACZ6441			MW056652	Paralicella tenuipes	Deutsches Zentrum fuer Marine Biodiversitaetsforschung	Mohrbeck et al. 2021	Alicellidae	Paralicella	Paralicella tenuipes		Clifton Nunnally	21-Feb-2015	Pacific Ocean	CP	Clarion Clipperton Zone	UK-1 exploration area	Stratum B	12.563	-116.717	4193	Baited trap	UK-1 Stratum B
SCAP	SCAP081-16	AB1-AMP137	BOLD:ACZ6441			MW056578	Paralicella tenuipes	Deutsches Zentrum fuer Marine Biodiversitaetsforschung	Mohrbeck et al. 2021	Alicellidae	Paralicella	Paralicella tenuipes		Jeffrey Drazen, Clifton Nunnally	10-Oct-2013	Pacific Ocean	CP	northeast equatorial|Clarion Clipperton Zone	UK-1 lease block	Stratum A	13.85	-116.623	4082	Baited trap	B
SCAP	SCAP575-16	AB2-AMP1551	BOLD:ACZ6236		MZ655961	MW057037	Paralicella tenuipes	Deutsches Zentrum fuer Marine Biodiversitaetsforschung	Mohrbeck et al. 2021	Alicellidae	Paralicella	Paralicella tenuipes		Clifton Nunnally	21-Feb-2015	Pacific Ocean	CP	Clarion Clipperton Zone	UK-1 exploration area	Stratum B	12.563	-116.717	4193	Baited trap	UK-1 Stratum B
SCAP	SCAP574-16	AB2-AMP1550	BOLD:ACZ6235			MW056660	Paralicella tenuipes	Deutsches Zentrum fuer Marine Biodiversitaetsforschung	Mohrbeck et al. 2021	Alicellidae	Paralicella	Paralicella tenuipes		Clifton Nunnally	21-Feb-2015	Pacific Ocean	CP	Clarion Clipperton Zone	UK-1 exploration area	Stratum B	12.563	-116.717	4193	Baited trap	UK-1 Stratum B
SCAP	SCAP572-16	AB2-AMP1548	BOLD:ACZ6235			MW057083	Paralicella tenuipes	Deutsches Zentrum fuer Marine Biodiversitaetsforschung	Mohrbeck et al. 2021	Alicellidae	Paralicella	Paralicella tenuipes		Clifton Nunnally	21-Feb-2015	Pacific Ocean	CP	Clarion Clipperton Zone	UK-1 exploration area	Stratum B	12.563	-116.717	4193	Baited trap	UK-1 Stratum B
SCAP	SCAP571-16	AB2-AMP1547	BOLD:ACZ6441			MW056708	Paralicella tenuipes	Deutsches Zentrum fuer Marine Biodiversitaetsforschung	Mohrbeck et al. 2021	Alicellidae	Paralicella	Paralicella tenuipes		Clifton Nunnally	21-Feb-2015	Pacific Ocean	CP	Clarion Clipperton Zone	UK-1 exploration area	Stratum B	12.563	-116.717	4193	Baited trap	UK-1 Stratum B
SCAP	SCAP570-16	AB2-AMP1546	BOLD:ACZ6237			MW056982	Paralicella tenuipes	Deutsches Zentrum fuer Marine Biodiversitaetsforschung	Mohrbeck et al. 2021	Alicellidae	Paralicella	Paralicella tenuipes		Clifton Nunnally	21-Feb-2015	Pacific Ocean	CP	Clarion Clipperton Zone	UK-1 exploration area	Stratum B	12.563	-116.717	4193	Baited trap	UK-1 Stratum B
SCAP	SCAP569-16	AB2-AMP1544	BOLD:ACZ6441			MW056565	Paralicella tenuipes	Deutsches Zentrum fuer Marine Biodiversitaetsforschung	Mohrbeck et al. 2021	Alicellidae	Paralicella	Paralicella tenuipes		Clifton Nunnally	21-Feb-2015	Pacific Ocean	CP	Clarion Clipperton Zone	UK-1 exploration area	Stratum B	12.563	-116.717	4193	Baited trap	UK-1 Stratum B
SCAP	SCAP568-16	AB2-AMP1543	BOLD:ACZ6237			MW056903	Paralicella tenuipes	Deutsches Zentrum fuer Marine Biodiversitaetsforschung	Mohrbeck et al. 2021	Alicellidae	Paralicella	Paralicella tenuipes		Clifton Nunnally	21-Feb-2015	Pacific Ocean	CP	Clarion Clipperton Zone	UK-1 exploration area	Stratum B	12.563	-116.717	4193	Baited trap	UK-1 Stratum B
SCAP	SCAP566-16	AB2-AMP1540	BOLD:ACZ6237			MW056736	Paralicella tenuipes	Deutsches Zentrum fuer Marine Biodiversitaetsforschung	Mohrbeck et al. 2021	Alicellidae	Paralicella	Paralicella tenuipes		Clifton Nunnally	21-Feb-2015	Pacific Ocean	CP	Clarion Clipperton Zone	UK-1 exploration area	Stratum B	12.563	-116.717	4193	Baited trap	UK-1 Stratum B
SCAP	SCAP564-16	AB2-AMP1538	BOLD:ACZ6237			MW056905	Paralicella tenuipes	Deutsches Zentrum fuer Marine Biodiversitaetsforschung	Mohrbeck et al. 2021	Alicellidae	Paralicella	Paralicella tenuipes		Clifton Nunnally	21-Feb-2015	Pacific Ocean	CP	Clarion Clipperton Zone	UK-1 exploration area	Stratum B	12.563	-116.717	4193	Baited trap	UK-1 Stratum B
SCAP	SCAP563-16	AB2-AMP768	BOLD:ACZ6235			MW056947	Paralicella tenuipes	Deutsches Zentrum fuer Marine Biodiversitaetsforschung	Mohrbeck et al. 2021	Alicellidae	Paralicella	Paralicella tenuipes		Clifton Nunnally	18-Feb-2015	Pacific Ocean	CP	Clarion Clipperton Zone	UK-1 exploration area	Stratum B	12.384	-116.491	4149	Baited trap	UK-1 Stratum B
SCAP	SCAP519-16	AB2-AMP68	BOLD:ACZ6237			MW057103	Paralicella tenuipes	Deutsches Zentrum fuer Marine Biodiversitaetsforschung	Mohrbeck et al. 2021	Alicellidae	Paralicella	Paralicella tenuipes		Clifton Nunnally	18-Feb-2015	Pacific Ocean	CP	Clarion Clipperton Zone	UK-1 exploration area	Stratum B	12.384	-116.491	4149	Baited trap	UK-1 Stratum B
SCAP	SCAP557-16	AB2-AMP756	BOLD:ACZ6441			MW056698	Paralicella tenuipes	Deutsches Zentrum fuer Marine Biodiversitaetsforschung	Mohrbeck et al. 2021	Alicellidae	Paralicella	Paralicella tenuipes		Clifton Nunnally	18-Feb-2015	Pacific Ocean	CP	Clarion Clipperton Zone	UK-1 exploration area	Stratum B	12.384	-116.491	4149	Baited trap	UK-1 Stratum B
SCAP	SCAP556-16	AB2-AMP752	BOLD:ACZ6441			MW057128	Paralicella tenuipes	Deutsches Zentrum fuer Marine Biodiversitaetsforschung	Mohrbeck et al. 2021	Alicellidae	Paralicella	Paralicella tenuipes		Clifton Nunnally	18-Feb-2015	Pacific Ocean	CP	Clarion Clipperton Zone	UK-1 exploration area	Stratum B	12.384	-116.491	4149	Baited trap	UK-1 Stratum B
SCAP	SCAP555-16	AB2-AMP751	BOLD:ACZ6236		MZ655927	MW056676	Paralicella tenuipes	Deutsches Zentrum fuer Marine Biodiversitaetsforschung	Mohrbeck et al. 2021	Alicellidae	Paralicella	Paralicella tenuipes		Clifton Nunnally	18-Feb-2015	Pacific Ocean	CP	Clarion Clipperton Zone	UK-1 exploration area	Stratum B	12.384	-116.491	4149	Baited trap	UK-1 Stratum B
SCAP	SCAP547-16	AB2-AMP734	BOLD:ACZ6441			MW056859	Paralicella tenuipes	Deutsches Zentrum fuer Marine Biodiversitaetsforschung	Mohrbeck et al. 2021	Alicellidae	Paralicella	Paralicella tenuipes		Clifton Nunnally	18-Feb-2015	Pacific Ocean	CP	Clarion Clipperton Zone	UK-1 exploration area	Stratum B	12.384	-116.491	4149	Baited trap	UK-1 Stratum B
SCAP	SCAP545-16	AB2-AMP730	BOLD:ACZ6441			MW057076	Paralicella tenuipes	Deutsches Zentrum fuer Marine Biodiversitaetsforschung	Mohrbeck et al. 2021	Alicellidae	Paralicella	Paralicella tenuipes		Clifton Nunnally	18-Feb-2015	Pacific Ocean	CP	Clarion Clipperton Zone	UK-1 exploration area	Stratum B	12.384	-116.491	4149	Baited trap	UK-1 Stratum B
SCAP	SCAP544-16	AB2-AMP729	BOLD:ACZ6441			MW056527	Paralicella tenuipes	Deutsches Zentrum fuer Marine Biodiversitaetsforschung	Mohrbeck et al. 2021	Alicellidae	Paralicella	Paralicella tenuipes		Clifton Nunnally	18-Feb-2015	Pacific Ocean	CP	Clarion Clipperton Zone	UK-1 exploration area	Stratum B	12.384	-116.491	4149	Baited trap	UK-1 Stratum B
SCAP	SCAP538-16	AB2-AMP704	BOLD:ACZ6441			MW056628	Paralicella tenuipes	Deutsches Zentrum fuer Marine Biodiversitaetsforschung	Mohrbeck et al. 2021	Alicellidae	Paralicella	Paralicella tenuipes		Clifton Nunnally	18-Feb-2015	Pacific Ocean	CP	Clarion Clipperton Zone	UK-1 exploration area	Stratum B	12.384	-116.491	4149	Baited trap	UK-1 Stratum B
SCAP	SCAP530-16	AB2-AMP96	BOLD:ACZ6237			MW056911	Paralicella tenuipes	Deutsches Zentrum fuer Marine Biodiversitaetsforschung	Mohrbeck et al. 2021	Alicellidae	Paralicella	Paralicella tenuipes		Clifton Nunnally	18-Feb-2015	Pacific Ocean	CP	Clarion Clipperton Zone	UK-1 exploration area	Stratum B	12.384	-116.491	4149	Baited trap	UK-1 Stratum B
SCAP	SCAP529-16	AB2-AMP92	BOLD:ACZ6441			MW057061	Paralicella tenuipes	Deutsches Zentrum fuer Marine Biodiversitaetsforschung	Mohrbeck et al. 2021	Alicellidae	Paralicella	Paralicella tenuipes		Clifton Nunnally	18-Feb-2015	Pacific Ocean	CP	Clarion Clipperton Zone	UK-1 exploration area	Stratum B	12.384	-116.491	4149	Baited trap	UK-1 Stratum B
SCAP	SCAP526-16	AB2-AMP84	BOLD:ACZ6441			MW056980	Paralicella tenuipes	Deutsches Zentrum fuer Marine Biodiversitaetsforschung	Mohrbeck et al. 2021	Alicellidae	Paralicella	Paralicella tenuipes		Clifton Nunnally	18-Feb-2015	Pacific Ocean	CP	Clarion Clipperton Zone	UK-1 exploration area	Stratum B	12.384	-116.491	4149	Baited trap	UK-1 Stratum B
SCAP	SCAP522-16	AB2-AMP72	BOLD:ACZ6441			MW056735	Paralicella tenuipes	Deutsches Zentrum fuer Marine Biodiversitaetsforschung	Mohrbeck et al. 2021	Alicellidae	Paralicella	Paralicella tenuipes		Clifton Nunnally	18-Feb-2015	Pacific Ocean	CP	Clarion Clipperton Zone	UK-1 exploration area	Stratum B	12.384	-116.491	4149	Baited trap	UK-1 Stratum B
SCAP	SCAP520-16	AB2-AMP69	BOLD:ACZ6441			MW056695	Paralicella tenuipes	Deutsches Zentrum fuer Marine Biodiversitaetsforschung	Mohrbeck et al. 2021	Alicellidae	Paralicella	Paralicella tenuipes		Clifton Nunnally	18-Feb-2015	Pacific Ocean	CP	Clarion Clipperton Zone	UK-1 exploration area	Stratum B	12.384	-116.491	4149	Baited trap	UK-1 Stratum B
SCAP	SCAP420-16	AB1-AMP605	BOLD:ACZ6237			MW056794	Paralicella tenuipes	Deutsches Zentrum fuer Marine Biodiversitaetsforschung	Mohrbeck et al. 2021	Alicellidae	Paralicella	Paralicella tenuipes		Jeffrey Drazen, Clifton Nunnally	10-Oct-2013	Pacific Ocean	CP	northeast equatorial|Clarion Clipperton Zone	UK-1 lease block	Stratum A	13.85	-116.623	4082	Baited trap	B
SCAP	SCAP518-16	AB2-AMP64	BOLD:ACZ6237			MW056946	Paralicella tenuipes	Deutsches Zentrum fuer Marine Biodiversitaetsforschung	Mohrbeck et al. 2021	Alicellidae	Paralicella	Paralicella tenuipes		Clifton Nunnally	18-Feb-2015	Pacific Ocean	CP	Clarion Clipperton Zone	UK-1 exploration area	Stratum B	12.384	-116.491	4149	Baited trap	UK-1 Stratum B
SCAP	SCAP515-16	AB2-AMP60	BOLD:ACZ6441			MW056820	Paralicella tenuipes	Deutsches Zentrum fuer Marine Biodiversitaetsforschung	Mohrbeck et al. 2021	Alicellidae	Paralicella	Paralicella tenuipes		Clifton Nunnally	18-Feb-2015	Pacific Ocean	CP	Clarion Clipperton Zone	UK-1 exploration area	Stratum B	12.384	-116.491	4149	Baited trap	UK-1 Stratum B
SCAP	SCAP514-16	AB2-AMP59	BOLD:ACZ6237			MW057092	Paralicella tenuipes	Deutsches Zentrum fuer Marine Biodiversitaetsforschung	Mohrbeck et al. 2021	Alicellidae	Paralicella	Paralicella tenuipes		Clifton Nunnally	18-Feb-2015	Pacific Ocean	CP	Clarion Clipperton Zone	UK-1 exploration area	Stratum B	12.384	-116.491	4149	Baited trap	UK-1 Stratum B
SCAP	SCAP513-16	AB2-AMP58	BOLD:ACZ6441			MW056755	Paralicella tenuipes	Deutsches Zentrum fuer Marine Biodiversitaetsforschung	Mohrbeck et al. 2021	Alicellidae	Paralicella	Paralicella tenuipes		Clifton Nunnally	18-Feb-2015	Pacific Ocean	CP	Clarion Clipperton Zone	UK-1 exploration area	Stratum B	12.384	-116.491	4149	Baited trap	UK-1 Stratum B
SCAP	SCAP511-16	AB2-AMP56	BOLD:ACZ6237	MZ655901	MZ655941	MW056788	Paralicella tenuipes	Deutsches Zentrum fuer Marine Biodiversitaetsforschung	Mohrbeck et al. 2021	Alicellidae	Paralicella	Paralicella tenuipes		Clifton Nunnally	18-Feb-2015	Pacific Ocean	CP	Clarion Clipperton Zone	UK-1 exploration area	Stratum B	12.384	-116.491	4149	Baited trap	UK-1 Stratum B
SCAP	SCAP509-16	AB2-AMP49	BOLD:ACZ6441			MW057023	Paralicella tenuipes	Deutsches Zentrum fuer Marine Biodiversitaetsforschung	Mohrbeck et al. 2021	Alicellidae	Paralicella	Paralicella tenuipes		Clifton Nunnally	18-Feb-2015	Pacific Ocean	CP	Clarion Clipperton Zone	UK-1 exploration area	Stratum B	12.384	-116.491	4149	Baited trap	UK-1 Stratum B
SCAP	SCAP507-16	AB2-AMP46	BOLD:ACZ6237			MW056870	Paralicella tenuipes	Deutsches Zentrum fuer Marine Biodiversitaetsforschung	Mohrbeck et al. 2021	Alicellidae	Paralicella	Paralicella tenuipes		Clifton Nunnally	18-Feb-2015	Pacific Ocean	CP	Clarion Clipperton Zone	UK-1 exploration area	Stratum B	12.384	-116.491	4149	Baited trap	UK-1 Stratum B
SCAP	SCAP506-16	AB2-AMP45	BOLD:ACZ6441			MW056789	Paralicella tenuipes	Deutsches Zentrum fuer Marine Biodiversitaetsforschung	Mohrbeck et al. 2021	Alicellidae	Paralicella	Paralicella tenuipes		Clifton Nunnally	18-Feb-2015	Pacific Ocean	CP	Clarion Clipperton Zone	UK-1 exploration area	Stratum B	12.384	-116.491	4149	Baited trap	UK-1 Stratum B
SCAP	SCAP504-16	AB2-AMP43	BOLD:ACZ6441			MW057156	Paralicella tenuipes	Deutsches Zentrum fuer Marine Biodiversitaetsforschung	Mohrbeck et al. 2021	Alicellidae	Paralicella	Paralicella tenuipes		Clifton Nunnally	18-Feb-2015	Pacific Ocean	CP	Clarion Clipperton Zone	UK-1 exploration area	Stratum B	12.384	-116.491	4149	Baited trap	UK-1 Stratum B
SCAP	SCAP502-16	AB2-AMP41	BOLD:ACZ6441			MW057117	Paralicella tenuipes	Deutsches Zentrum fuer Marine Biodiversitaetsforschung	Mohrbeck et al. 2021	Alicellidae	Paralicella	Paralicella tenuipes		Clifton Nunnally	18-Feb-2015	Pacific Ocean	CP	Clarion Clipperton Zone	UK-1 exploration area	Stratum B	12.384	-116.491	4149	Baited trap	UK-1 Stratum B
SCAP	SCAP501-16	AB2-AMP40	BOLD:ACZ6441			MW056938	Paralicella tenuipes	Deutsches Zentrum fuer Marine Biodiversitaetsforschung	Mohrbeck et al. 2021	Alicellidae	Paralicella	Paralicella tenuipes		Clifton Nunnally	18-Feb-2015	Pacific Ocean	CP	Clarion Clipperton Zone	UK-1 exploration area	Stratum B	12.384	-116.491	4149	Baited trap	UK-1 Stratum B
SCAP	SCAP500-16	AB2-AMP39	BOLD:ACZ6235			MW056730	Paralicella tenuipes	Deutsches Zentrum fuer Marine Biodiversitaetsforschung	Mohrbeck et al. 2021	Alicellidae	Paralicella	Paralicella tenuipes		Clifton Nunnally	18-Feb-2015	Pacific Ocean	CP	Clarion Clipperton Zone	UK-1 exploration area	Stratum B	12.384	-116.491	4149	Baited trap	UK-1 Stratum B
SCAP	SCAP499-16	AB2-AMP38	BOLD:ACZ6237			MW056934	Paralicella tenuipes	Deutsches Zentrum fuer Marine Biodiversitaetsforschung	Mohrbeck et al. 2021	Alicellidae	Paralicella	Paralicella tenuipes		Clifton Nunnally	18-Feb-2015	Pacific Ocean	CP	Clarion Clipperton Zone	UK-1 exploration area	Stratum B	12.384	-116.491	4149	Baited trap	UK-1 Stratum B
SCAP	SCAP498-16	AB2-AMP37	BOLD:ACZ6236			MW056594	Paralicella tenuipes	Deutsches Zentrum fuer Marine Biodiversitaetsforschung	Mohrbeck et al. 2021	Alicellidae	Paralicella	Paralicella tenuipes		Clifton Nunnally	18-Feb-2015	Pacific Ocean	CP	Clarion Clipperton Zone	UK-1 exploration area	Stratum B	12.384	-116.491	4149	Baited trap	UK-1 Stratum B
SCAP	SCAP496-16	AB2-AMP35	BOLD:ACZ6441			MW056983	Paralicella tenuipes	Deutsches Zentrum fuer Marine Biodiversitaetsforschung	Mohrbeck et al. 2021	Alicellidae	Paralicella	Paralicella tenuipes		Clifton Nunnally	18-Feb-2015	Pacific Ocean	CP	Clarion Clipperton Zone	UK-1 exploration area	Stratum B	12.384	-116.491	4149	Baited trap	UK-1 Stratum B
SCAP	SCAP494-16	AB2-AMP33	BOLD:ACZ6441			MW056941	Paralicella tenuipes	Deutsches Zentrum fuer Marine Biodiversitaetsforschung	Mohrbeck et al. 2021	Alicellidae	Paralicella	Paralicella tenuipes		Clifton Nunnally	18-Feb-2015	Pacific Ocean	CP	Clarion Clipperton Zone	UK-1 exploration area	Stratum B	12.384	-116.491	4149	Baited trap	UK-1 Stratum B
SCAP	SCAP493-16	AB2-AMP32	BOLD:ACZ6237			MW056601	Paralicella tenuipes	Deutsches Zentrum fuer Marine Biodiversitaetsforschung	Mohrbeck et al. 2021	Alicellidae	Paralicella	Paralicella tenuipes		Clifton Nunnally	18-Feb-2015	Pacific Ocean	CP	Clarion Clipperton Zone	UK-1 exploration area	Stratum B	12.384	-116.491	4149	Baited trap	UK-1 Stratum B
SCAP	SCAP492-16	AB2-AMP30	BOLD:ACZ6441			MW056664	Paralicella tenuipes	Deutsches Zentrum fuer Marine Biodiversitaetsforschung	Mohrbeck et al. 2021	Alicellidae	Paralicella	Paralicella tenuipes		Clifton Nunnally	18-Feb-2015	Pacific Ocean	CP	Clarion Clipperton Zone	UK-1 exploration area	Stratum B	12.384	-116.491	4149	Baited trap	UK-1 Stratum B
SCAP	SCAP491-16	AB2-AMP29	BOLD:ACZ6237			MW056550	Paralicella tenuipes	Deutsches Zentrum fuer Marine Biodiversitaetsforschung	Mohrbeck et al. 2021	Alicellidae	Paralicella	Paralicella tenuipes		Clifton Nunnally	18-Feb-2015	Pacific Ocean	CP	Clarion Clipperton Zone	UK-1 exploration area	Stratum B	12.384	-116.491	4149	Baited trap	UK-1 Stratum B
SCAP	SCAP490-16	AB2-AMP28	BOLD:ACZ6441			MW056714	Paralicella tenuipes	Deutsches Zentrum fuer Marine Biodiversitaetsforschung	Mohrbeck et al. 2021	Alicellidae	Paralicella	Paralicella tenuipes		Clifton Nunnally	18-Feb-2015	Pacific Ocean	CP	Clarion Clipperton Zone	UK-1 exploration area	Stratum B	12.384	-116.491	4149	Baited trap	UK-1 Stratum B
SCAP	SCAP489-16	AB2-AMP26	BOLD:ACZ6441			MW056879	Paralicella tenuipes	Deutsches Zentrum fuer Marine Biodiversitaetsforschung	Mohrbeck et al. 2021	Alicellidae	Paralicella	Paralicella tenuipes		Clifton Nunnally	18-Feb-2015	Pacific Ocean	CP	Clarion Clipperton Zone	UK-1 exploration area	Stratum B	12.384	-116.491	4149	Baited trap	UK-1 Stratum B
SCAP	SCAP488-16	AB2-AMP24	BOLD:ACZ6441			MW056591	Paralicella tenuipes	Deutsches Zentrum fuer Marine Biodiversitaetsforschung	Mohrbeck et al. 2021	Alicellidae	Paralicella	Paralicella tenuipes		Clifton Nunnally	18-Feb-2015	Pacific Ocean	CP	Clarion Clipperton Zone	UK-1 exploration area	Stratum B	12.384	-116.491	4149	Baited trap	UK-1 Stratum B
SCAP	SCAP487-16	AB2-AMP23	BOLD:ACZ6441			MW056850	Paralicella tenuipes	Deutsches Zentrum fuer Marine Biodiversitaetsforschung	Mohrbeck et al. 2021	Alicellidae	Paralicella	Paralicella tenuipes		Clifton Nunnally	18-Feb-2015	Pacific Ocean	CP	Clarion Clipperton Zone	UK-1 exploration area	Stratum B	12.384	-116.491	4149	Baited trap	UK-1 Stratum B
SCAP	SCAP486-16	AB2-AMP22	BOLD:ACZ6441			MW056721	Paralicella tenuipes	Deutsches Zentrum fuer Marine Biodiversitaetsforschung	Mohrbeck et al. 2021	Alicellidae	Paralicella	Paralicella tenuipes		Clifton Nunnally	18-Feb-2015	Pacific Ocean	CP	Clarion Clipperton Zone	UK-1 exploration area	Stratum B	12.384	-116.491	4149	Baited trap	UK-1 Stratum B
SCAP	SCAP485-16	AB2-AMP21	BOLD:ACZ6237			MW056810	Paralicella tenuipes	Deutsches Zentrum fuer Marine Biodiversitaetsforschung	Mohrbeck et al. 2021	Alicellidae	Paralicella	Paralicella tenuipes		Clifton Nunnally	18-Feb-2015	Pacific Ocean	CP	Clarion Clipperton Zone	UK-1 exploration area	Stratum B	12.384	-116.491	4149	Baited trap	UK-1 Stratum B
SCAP	SCAP484-16	AB2-AMP20	BOLD:ACZ6237			MW056779	Paralicella tenuipes	Deutsches Zentrum fuer Marine Biodiversitaetsforschung	Mohrbeck et al. 2021	Alicellidae	Paralicella	Paralicella tenuipes		Clifton Nunnally	18-Feb-2015	Pacific Ocean	CP	Clarion Clipperton Zone	UK-1 exploration area	Stratum B	12.384	-116.491	4149	Baited trap	UK-1 Stratum B
SCAP	SCAP481-16	AB2-AMP16	BOLD:ACZ6237			MW057133	Paralicella tenuipes	Deutsches Zentrum fuer Marine Biodiversitaetsforschung	Mohrbeck et al. 2021	Alicellidae	Paralicella	Paralicella tenuipes		Clifton Nunnally	18-Feb-2015	Pacific Ocean	CP	Clarion Clipperton Zone	UK-1 exploration area	Stratum B	12.384	-116.491	4149	Baited trap	UK-1 Stratum B
SCAP	SCAP480-16	AB2-AMP15	BOLD:ACZ6237			MW056976	Paralicella tenuipes	Deutsches Zentrum fuer Marine Biodiversitaetsforschung	Mohrbeck et al. 2021	Alicellidae	Paralicella	Paralicella tenuipes		Clifton Nunnally	18-Feb-2015	Pacific Ocean	CP	Clarion Clipperton Zone	UK-1 exploration area	Stratum B	12.384	-116.491	4149	Baited trap	UK-1 Stratum B
SCAP	SCAP479-16	AB2-AMP14	BOLD:ACZ6237			MW056854	Paralicella tenuipes	Deutsches Zentrum fuer Marine Biodiversitaetsforschung	Mohrbeck et al. 2021	Alicellidae	Paralicella	Paralicella tenuipes		Clifton Nunnally	18-Feb-2015	Pacific Ocean	CP	Clarion Clipperton Zone	UK-1 exploration area	Stratum B	12.384	-116.491	4149	Baited trap	UK-1 Stratum B
SCAP	SCAP477-16	AB2-AMP11	BOLD:ACZ6441			MW056968	Paralicella tenuipes	Deutsches Zentrum fuer Marine Biodiversitaetsforschung	Mohrbeck et al. 2021	Alicellidae	Paralicella	Paralicella tenuipes		Clifton Nunnally	18-Feb-2015	Pacific Ocean	CP	Clarion Clipperton Zone	UK-1 exploration area	Stratum B	12.384	-116.491	4149	Baited trap	UK-1 Stratum B
SCAP	SCAP475-16	AB2-AMP8	BOLD:ACZ6441			MW056834	Paralicella tenuipes	Deutsches Zentrum fuer Marine Biodiversitaetsforschung	Mohrbeck et al. 2021	Alicellidae	Paralicella	Paralicella tenuipes		Clifton Nunnally	18-Feb-2015	Pacific Ocean	CP	Clarion Clipperton Zone	UK-1 exploration area	Stratum B	12.384	-116.491	4149	Baited trap	UK-1 Stratum B
SCAP	SCAP473-16	AB2-AMP4	BOLD:ACZ6237			MW056989	Paralicella tenuipes	Deutsches Zentrum fuer Marine Biodiversitaetsforschung	Mohrbeck et al. 2021	Alicellidae	Paralicella	Paralicella tenuipes		Clifton Nunnally	18-Feb-2015	Pacific Ocean	CP	Clarion Clipperton Zone	UK-1 exploration area	Stratum B	12.384	-116.491	4149	Baited trap	UK-1 Stratum B
SCAP	SCAP471-16	AB2-AMP2	BOLD:ACZ6237			MW056920	Paralicella tenuipes	Deutsches Zentrum fuer Marine Biodiversitaetsforschung	Mohrbeck et al. 2021	Alicellidae	Paralicella	Paralicella tenuipes		Clifton Nunnally	18-Feb-2015	Pacific Ocean	CP	Clarion Clipperton Zone	UK-1 exploration area	Stratum B	12.384	-116.491	4149	Baited trap	UK-1 Stratum B
SCAP	SCAP635-16	AB2-AMP2258	BOLD:ACZ6441			MW056969	Paralicella tenuipes	Deutsches Zentrum fuer Marine Biodiversitaetsforschung	Mohrbeck et al. 2021	Alicellidae	Paralicella	Paralicella tenuipes		Clifton Nunnally	24-Feb-2015	Pacific Ocean	CP	Clarion Clipperton Zone	OMS-1 exploration area	Stratum A	12.118	-117.35	4183	Baited trap	OMS-1 Stratum A
SCAP	SCAP651-16	AB2-AMP3650	BOLD:ACZ6441			MW056831	Paralicella tenuipes	Deutsches Zentrum fuer Marine Biodiversitaetsforschung	Mohrbeck et al. 2021	Alicellidae	Paralicella	Paralicella tenuipes		Clifton Nunnally	13-Mar-2015	Pacific Ocean	CP	Clarion Clipperton Zone	OMS-1 exploration area	Stratum A	12.055	-117.227	4071	Baited trap	OMS-1 Stratum A
SCAP	SCAP328-16	AB1-AMP477	BOLD:ACZ6237			MW056781	Paralicella tenuipes	Deutsches Zentrum fuer Marine Biodiversitaetsforschung	Mohrbeck et al. 2021	Alicellidae	Paralicella	Paralicella tenuipes		Jeffrey Drazen, Clifton Nunnally	10-Oct-2013	Pacific Ocean	CP	northeast equatorial|Clarion Clipperton Zone	UK-1 lease block	Stratum A	13.85	-116.623	4082	Baited trap	B
SCAP	SCAP291-16	AB1-AMP432	BOLD:ACZ6441			MW057124	Paralicella tenuipes	Deutsches Zentrum fuer Marine Biodiversitaetsforschung	Mohrbeck et al. 2021	Alicellidae	Paralicella	Paralicella tenuipes		Jeffrey Drazen, Clifton Nunnally	10-Oct-2013	Pacific Ocean	CP	northeast equatorial|Clarion Clipperton Zone	UK-1 lease block	Stratum A	13.85	-116.623	4082	Baited trap	B
SCAP	SCAP289-16	AB1-AMP430	BOLD:ACZ6236			MW056806	Paralicella tenuipes	Deutsches Zentrum fuer Marine Biodiversitaetsforschung	Mohrbeck et al. 2021	Alicellidae	Paralicella	Paralicella tenuipes		Jeffrey Drazen, Clifton Nunnally	10-Oct-2013	Pacific Ocean	CP	northeast equatorial|Clarion Clipperton Zone	UK-1 lease block	Stratum A	13.85	-116.623	4082	Baited trap	B
SCAP	SCAP277-16	AB1-AMP413	BOLD:ACZ6441			MW056800	Paralicella tenuipes	Deutsches Zentrum fuer Marine Biodiversitaetsforschung	Mohrbeck et al. 2021	Alicellidae	Paralicella	Paralicella tenuipes		Jeffrey Drazen, Clifton Nunnally	10-Oct-2013	Pacific Ocean	CP	northeast equatorial|Clarion Clipperton Zone	UK-1 lease block	Stratum A	13.85	-116.623	4082	Baited trap	B
SCAP	SCAP260-16	AB1-AMP391	BOLD:ACZ6441			MW056765	Paralicella tenuipes	Deutsches Zentrum fuer Marine Biodiversitaetsforschung	Mohrbeck et al. 2021	Alicellidae	Paralicella	Paralicella tenuipes		Jeffrey Drazen, Clifton Nunnally	10-Oct-2013	Pacific Ocean	CP	northeast equatorial|Clarion Clipperton Zone	UK-1 lease block	Stratum A	13.85	-116.623	4082	Baited trap	B
SCAP	SCAP249-16	AB1-AMP375	BOLD:ACZ6441			MW057019	Paralicella tenuipes	Deutsches Zentrum fuer Marine Biodiversitaetsforschung	Mohrbeck et al. 2021	Alicellidae	Paralicella	Paralicella tenuipes		Jeffrey Drazen, Clifton Nunnally	10-Oct-2013	Pacific Ocean	CP	northeast equatorial|Clarion Clipperton Zone	UK-1 lease block	Stratum A	13.85	-116.623	4082	Baited trap	B
SCAP	SCAP469-16	AB1-AMP672	BOLD:ACZ6237			MW056916	Paralicella tenuipes	Deutsches Zentrum fuer Marine Biodiversitaetsforschung	Mohrbeck et al. 2021	Alicellidae	Paralicella	Paralicella tenuipes		Jeffrey Drazen, Clifton Nunnally	10-Oct-2013	Pacific Ocean	CP	northeast equatorial|Clarion Clipperton Zone	UK-1 lease block	Stratum A	13.85	-116.623	4082	Baited trap	B
SCAP	SCAP240-16	AB1-AMP359	BOLD:ACZ6237			MW056612	Paralicella tenuipes	Deutsches Zentrum fuer Marine Biodiversitaetsforschung	Mohrbeck et al. 2021	Alicellidae	Paralicella	Paralicella tenuipes		Jeffrey Drazen, Clifton Nunnally	10-Oct-2013	Pacific Ocean	CP	northeast equatorial|Clarion Clipperton Zone	UK-1 lease block	Stratum A	13.85	-116.623	4082	Baited trap	B
SCAP	SCAP237-16	AB1-AMP351	BOLD:ACZ6236			MW056813	Paralicella tenuipes	Deutsches Zentrum fuer Marine Biodiversitaetsforschung	Mohrbeck et al. 2021	Alicellidae	Paralicella	Paralicella tenuipes		Jeffrey Drazen, Clifton Nunnally	10-Oct-2013	Pacific Ocean	CP	northeast equatorial|Clarion Clipperton Zone	UK-1 lease block	Stratum A	13.85	-116.623	4082	Baited trap	B
SCAP	SCAP236-16	AB1-AMP349	BOLD:ACZ6237			MW056737	Paralicella tenuipes	Deutsches Zentrum fuer Marine Biodiversitaetsforschung	Mohrbeck et al. 2021	Alicellidae	Paralicella	Paralicella tenuipes		Jeffrey Drazen, Clifton Nunnally	10-Oct-2013	Pacific Ocean	CP	northeast equatorial|Clarion Clipperton Zone	UK-1 lease block	Stratum A	13.85	-116.623	4082	Baited trap	B
SCAP	SCAP234-16	AB1-AMP345	BOLD:ACZ6441			MW057112	Paralicella tenuipes	Deutsches Zentrum fuer Marine Biodiversitaetsforschung	Mohrbeck et al. 2021	Alicellidae	Paralicella	Paralicella tenuipes		Jeffrey Drazen, Clifton Nunnally	10-Oct-2013	Pacific Ocean	CP	northeast equatorial|Clarion Clipperton Zone	UK-1 lease block	Stratum A	13.85	-116.623	4082	Baited trap	B
SCAP	SCAP232-16	AB1-AMP341	BOLD:ACZ6441			MW056559	Paralicella tenuipes	Deutsches Zentrum fuer Marine Biodiversitaetsforschung	Mohrbeck et al. 2021	Alicellidae	Paralicella	Paralicella tenuipes		Jeffrey Drazen, Clifton Nunnally	10-Oct-2013	Pacific Ocean	CP	northeast equatorial|Clarion Clipperton Zone	UK-1 lease block	Stratum A	13.85	-116.623	4082	Baited trap	B
SCAP	SCAP231-16	AB1-AMP340	BOLD:ACZ6441			MW056700	Paralicella tenuipes	Deutsches Zentrum fuer Marine Biodiversitaetsforschung	Mohrbeck et al. 2021	Alicellidae	Paralicella	Paralicella tenuipes		Jeffrey Drazen, Clifton Nunnally	10-Oct-2013	Pacific Ocean	CP	northeast equatorial|Clarion Clipperton Zone	UK-1 lease block	Stratum A	13.85	-116.623	4082	Baited trap	B
SCAP	SCAP229-16	AB1-AMP338	BOLD:ACZ6237			MW056972	Paralicella tenuipes	Deutsches Zentrum fuer Marine Biodiversitaetsforschung	Mohrbeck et al. 2021	Alicellidae	Paralicella	Paralicella tenuipes		Jeffrey Drazen, Clifton Nunnally	10-Oct-2013	Pacific Ocean	CP	northeast equatorial|Clarion Clipperton Zone	UK-1 lease block	Stratum A	13.85	-116.623	4082	Baited trap	B
SCAP	SCAP222-16	AB1-AMP330	BOLD:ACZ6441			MW056953	Paralicella tenuipes	Deutsches Zentrum fuer Marine Biodiversitaetsforschung	Mohrbeck et al. 2021	Alicellidae	Paralicella	Paralicella tenuipes		Jeffrey Drazen, Clifton Nunnally	10-Oct-2013	Pacific Ocean	CP	northeast equatorial|Clarion Clipperton Zone	UK-1 lease block	Stratum A	13.85	-116.623	4082	Baited trap	B
SCAP	SCAP219-16	AB1-AMP327	BOLD:ACZ6441			MW056754	Paralicella tenuipes	Deutsches Zentrum fuer Marine Biodiversitaetsforschung	Mohrbeck et al. 2021	Alicellidae	Paralicella	Paralicella tenuipes		Jeffrey Drazen, Clifton Nunnally	10-Oct-2013	Pacific Ocean	CP	northeast equatorial|Clarion Clipperton Zone	UK-1 lease block	Stratum A	13.85	-116.623	4082	Baited trap	B
SCAP	SCAP215-16	AB1-AMP323	BOLD:ACZ6441			MW056930	Paralicella tenuipes	Deutsches Zentrum fuer Marine Biodiversitaetsforschung	Mohrbeck et al. 2021	Alicellidae	Paralicella	Paralicella tenuipes		Jeffrey Drazen, Clifton Nunnally	10-Oct-2013	Pacific Ocean	CP	northeast equatorial|Clarion Clipperton Zone	UK-1 lease block	Stratum A	13.85	-116.623	4082	Baited trap	B
SCAP	SCAP203-16	AB1-AMP305	BOLD:ACZ6441			MW057011	Paralicella tenuipes	Deutsches Zentrum fuer Marine Biodiversitaetsforschung	Mohrbeck et al. 2021	Alicellidae	Paralicella	Paralicella tenuipes		Jeffrey Drazen, Clifton Nunnally	10-Oct-2013	Pacific Ocean	CP	northeast equatorial|Clarion Clipperton Zone	UK-1 lease block	Stratum A	13.85	-116.623	4082	Baited trap	B
SCAP	SCAP201-16	AB1-AMP303	BOLD:ACZ6441			MW056749	Paralicella tenuipes	Deutsches Zentrum fuer Marine Biodiversitaetsforschung	Mohrbeck et al. 2021	Alicellidae	Paralicella	Paralicella tenuipes		Jeffrey Drazen, Clifton Nunnally	10-Oct-2013	Pacific Ocean	CP	northeast equatorial|Clarion Clipperton Zone	UK-1 lease block	Stratum A	13.85	-116.623	4082	Baited trap	B
SCAP	SCAP192-16	AB1-AMP292	BOLD:ACZ6441			MW057080	Paralicella tenuipes	Deutsches Zentrum fuer Marine Biodiversitaetsforschung	Mohrbeck et al. 2021	Alicellidae	Paralicella	Paralicella tenuipes		Jeffrey Drazen, Clifton Nunnally	10-Oct-2013	Pacific Ocean	CP	northeast equatorial|Clarion Clipperton Zone	UK-1 lease block	Stratum A	13.85	-116.623	4082	Baited trap	B
SCAP	SCAP188-16	AB1-AMP285	BOLD:ACZ6441			MW056536	Paralicella tenuipes	Deutsches Zentrum fuer Marine Biodiversitaetsforschung	Mohrbeck et al. 2021	Alicellidae	Paralicella	Paralicella tenuipes		Jeffrey Drazen, Clifton Nunnally	10-Oct-2013	Pacific Ocean	CP	northeast equatorial|Clarion Clipperton Zone	UK-1 lease block	Stratum A	13.85	-116.623	4082	Baited trap	B
SCAP	SCAP178-16	AB1-AMP274	BOLD:ACZ6441			MW056619	Paralicella tenuipes	Deutsches Zentrum fuer Marine Biodiversitaetsforschung	Mohrbeck et al. 2021	Alicellidae	Paralicella	Paralicella tenuipes		Jeffrey Drazen, Clifton Nunnally	10-Oct-2013	Pacific Ocean	CP	northeast equatorial|Clarion Clipperton Zone	UK-1 lease block	Stratum A	13.85	-116.623	4082	Baited trap	B
SCAP	SCAP159-16	AB1-AMP242	BOLD:ACZ6237			MW057151	Paralicella tenuipes	Deutsches Zentrum fuer Marine Biodiversitaetsforschung	Mohrbeck et al. 2021	Alicellidae	Paralicella	Paralicella tenuipes		Jeffrey Drazen, Clifton Nunnally	10-Oct-2013	Pacific Ocean	CP	northeast equatorial|Clarion Clipperton Zone	UK-1 lease block	Stratum A	13.85	-116.623	4082	Baited trap	B
SCAP	SCAP155-16	AB1-AMP237	BOLD:ACZ6235			MW057110	Paralicella tenuipes	Deutsches Zentrum fuer Marine Biodiversitaetsforschung	Mohrbeck et al. 2021	Alicellidae	Paralicella	Paralicella tenuipes		Jeffrey Drazen, Clifton Nunnally	10-Oct-2013	Pacific Ocean	CP	northeast equatorial|Clarion Clipperton Zone	UK-1 lease block	Stratum A	13.85	-116.623	4082	Baited trap	B
SCAP	SCAP637-16	AB2-AMP2262	BOLD:ACZ6235		MZ655919	MW056617	Paralicella tenuipes	Deutsches Zentrum fuer Marine Biodiversitaetsforschung	Mohrbeck et al. 2021	Alicellidae	Paralicella	Paralicella tenuipes		Clifton Nunnally	24-Feb-2015	Pacific Ocean	CP	Clarion Clipperton Zone	OMS-1 exploration area	Stratum A	12.118	-117.35	4183	Baited trap	OMS-1 Stratum A
SCAP	SCAP145-16	AB1-AMP225	BOLD:ACZ6237			MW057025	Paralicella tenuipes	Deutsches Zentrum fuer Marine Biodiversitaetsforschung	Mohrbeck et al. 2021	Alicellidae	Paralicella	Paralicella tenuipes		Jeffrey Drazen, Clifton Nunnally	10-Oct-2013	Pacific Ocean	CP	northeast equatorial|Clarion Clipperton Zone	UK-1 lease block	Stratum A	13.85	-116.623	4082	Baited trap	B
SCAP	SCAP139-16	AB1-AMP217	BOLD:ACZ6236			MW056790	Paralicella tenuipes	Deutsches Zentrum fuer Marine Biodiversitaetsforschung	Mohrbeck et al. 2021	Alicellidae	Paralicella	Paralicella tenuipes		Jeffrey Drazen, Clifton Nunnally	10-Oct-2013	Pacific Ocean	CP	northeast equatorial|Clarion Clipperton Zone	UK-1 lease block	Stratum A	13.85	-116.623	4082	Baited trap	B
SCAP	SCAP136-16	AB1-AMP214	BOLD:ACZ6441			MW056602	Paralicella tenuipes	Deutsches Zentrum fuer Marine Biodiversitaetsforschung	Mohrbeck et al. 2021	Alicellidae	Paralicella	Paralicella tenuipes		Jeffrey Drazen, Clifton Nunnally	10-Oct-2013	Pacific Ocean	CP	northeast equatorial|Clarion Clipperton Zone	UK-1 lease block	Stratum A	13.85	-116.623	4082	Baited trap	B
SCAP	SCAP135-16	AB1-AMP213	BOLD:ACZ6441			MW056937	Paralicella tenuipes	Deutsches Zentrum fuer Marine Biodiversitaetsforschung	Mohrbeck et al. 2021	Alicellidae	Paralicella	Paralicella tenuipes		Jeffrey Drazen, Clifton Nunnally	10-Oct-2013	Pacific Ocean	CP	northeast equatorial|Clarion Clipperton Zone	UK-1 lease block	Stratum A	13.85	-116.623	4082	Baited trap	B
SCAP	SCAP130-16	AB1-AMP205	BOLD:ACZ6441			MW056718	Paralicella tenuipes	Deutsches Zentrum fuer Marine Biodiversitaetsforschung	Mohrbeck et al. 2021	Alicellidae	Paralicella	Paralicella tenuipes		Jeffrey Drazen, Clifton Nunnally	10-Oct-2013	Pacific Ocean	CP	northeast equatorial|Clarion Clipperton Zone	UK-1 lease block	Stratum A	13.85	-116.623	4082	Baited trap	B
SCAP	SCAP126-16	AB1-AMP201	BOLD:ACZ6441			MW057071	Paralicella tenuipes	National Oceanography Center, Southampton	Mohrbeck et al. 2021	Alicellidae	Paralicella	Paralicella tenuipes		Jeffrey Drazen, Clifton Nunnally	10-Oct-2013	Pacific Ocean	CP	northeast equatorial|Clarion Clipperton Zone	UK-1 lease block	Stratum A	13.85	-116.623	4082	Baited trap	B
SCAP	SCAP123-16	AB1-AMP198	BOLD:ACZ6441			MW057045	Paralicella tenuipes	Deutsches Zentrum fuer Marine Biodiversitaetsforschung	Mohrbeck et al. 2021	Alicellidae	Paralicella	Paralicella tenuipes		Jeffrey Drazen, Clifton Nunnally	10-Oct-2013	Pacific Ocean	CP	northeast equatorial|Clarion Clipperton Zone	UK-1 lease block	Stratum A	13.85	-116.623	4082	Baited trap	B
SCAP	SCAP122-16	AB1-AMP196	BOLD:ACZ6237			MW057141	Paralicella tenuipes	Deutsches Zentrum fuer Marine Biodiversitaetsforschung	Mohrbeck et al. 2021	Alicellidae	Paralicella	Paralicella tenuipes		Jeffrey Drazen, Clifton Nunnally	10-Oct-2013	Pacific Ocean	CP	northeast equatorial|Clarion Clipperton Zone	UK-1 lease block	Stratum A	13.85	-116.623	4082	Baited trap	B
SCAP	SCAP119-16	AB1-AMP192	BOLD:ACZ6237			MW056640	Paralicella tenuipes	Deutsches Zentrum fuer Marine Biodiversitaetsforschung	Mohrbeck et al. 2021	Alicellidae	Paralicella	Paralicella tenuipes		Jeffrey Drazen, Clifton Nunnally	10-Oct-2013	Pacific Ocean	CP	northeast equatorial|Clarion Clipperton Zone	UK-1 lease block	Stratum A	13.85	-116.623	4082	Baited trap	B
SCAP	SCAP111-16	AB1-AMP174	BOLD:ACZ6441			MW056534	Paralicella tenuipes	National Oceanography Center, Southampton	Mohrbeck et al. 2021	Alicellidae	Paralicella	Paralicella tenuipes		Jeffrey Drazen, Clifton Nunnally	10-Oct-2013	Pacific Ocean	CP	northeast equatorial|Clarion Clipperton Zone	UK-1 lease block	Stratum A	13.85	-116.623	4082	Baited trap	B
SCAP	SCAP098-16	AB1-AMP159	BOLD:ACZ6441			MW056914	Paralicella tenuipes	Deutsches Zentrum fuer Marine Biodiversitaetsforschung	Mohrbeck et al. 2021	Alicellidae	Paralicella	Paralicella tenuipes		Jeffrey Drazen, Clifton Nunnally	10-Oct-2013	Pacific Ocean	CP	northeast equatorial|Clarion Clipperton Zone	UK-1 lease block	Stratum A	13.85	-116.623	4082	Baited trap	B
SCAP	SCAP091-16	AB1-AMP149	BOLD:ACZ6237			MW056849	Paralicella tenuipes	National Oceanography Center, Southampton	Mohrbeck et al. 2021	Alicellidae	Paralicella	Paralicella tenuipes		Jeffrey Drazen, Clifton Nunnally	10-Oct-2013	Pacific Ocean	CP	northeast equatorial|Clarion Clipperton Zone	UK-1 lease block	Stratum A	13.85	-116.623	4082	Baited trap	B
SCAP	SCAP086-16	AB1-AMP144	BOLD:ACZ6237			MW056796	Paralicella tenuipes	Deutsches Zentrum fuer Marine Biodiversitaetsforschung	Mohrbeck et al. 2021	Alicellidae	Paralicella	Paralicella tenuipes		Jeffrey Drazen, Clifton Nunnally	10-Oct-2013	Pacific Ocean	CP	northeast equatorial|Clarion Clipperton Zone	UK-1 lease block	Stratum A	13.85	-116.623	4082	Baited trap	B
SCAP	SCAP085-16	AB1-AMP143	BOLD:ACZ6237			MW056991	Paralicella tenuipes	National Oceanography Center, Southampton	Mohrbeck et al. 2021	Alicellidae	Paralicella	Paralicella tenuipes		Jeffrey Drazen, Clifton Nunnally	10-Oct-2013	Pacific Ocean	CP	northeast equatorial|Clarion Clipperton Zone	UK-1 lease block	Stratum A	13.85	-116.623	4082	Baited trap	B
SCAP	SCAP695-16	AB2-AMP3900	BOLD:ACZ6237			MW056747	Paralicella tenuipes	Deutsches Zentrum fuer Marine Biodiversitaetsforschung	Mohrbeck et al. 2021	Alicellidae	Paralicella	Paralicella tenuipes		Clifton Nunnally	20-Mar-2015	Pacific Ocean	CP	Clarion Clipperton Zone	Area of Particular Environmental Interest	Stratum A	19.451	-120.053	4057	Baited trap	APEI-4 Stratum A
SCAP	SCAP694-16	AB2-AMP3899	BOLD:ACZ6441			MW056948	Paralicella tenuipes	Deutsches Zentrum fuer Marine Biodiversitaetsforschung	Mohrbeck et al. 2021	Alicellidae	Paralicella	Paralicella tenuipes		Clifton Nunnally	20-Mar-2015	Pacific Ocean	CP	Clarion Clipperton Zone	Area of Particular Environmental Interest	Stratum A	19.451	-120.053	4057	Baited trap	APEI-4 Stratum A
SCAP	SCAP692-16	AB2-AMP3893	BOLD:ACZ6441			MW056720	Paralicella tenuipes	Deutsches Zentrum fuer Marine Biodiversitaetsforschung	Mohrbeck et al. 2021	Alicellidae	Paralicella	Paralicella tenuipes		Clifton Nunnally	20-Mar-2015	Pacific Ocean	CP	Clarion Clipperton Zone	Area of Particular Environmental Interest	Stratum A	19.451	-120.053	4057	Baited trap	APEI-4 Stratum A
SCAP	SCAP691-16	AB2-AMP3892	BOLD:ACZ6441			MW056965	Paralicella tenuipes	Deutsches Zentrum fuer Marine Biodiversitaetsforschung	Mohrbeck et al. 2021	Alicellidae	Paralicella	Paralicella tenuipes		Clifton Nunnally	20-Mar-2015	Pacific Ocean	CP	Clarion Clipperton Zone	Area of Particular Environmental Interest	Stratum A	19.451	-120.053	4057	Baited trap	APEI-4 Stratum A
SCAP	SCAP690-16	AB2-AMP3890	BOLD:ACZ6441			MW057024	Paralicella tenuipes	Deutsches Zentrum fuer Marine Biodiversitaetsforschung	Mohrbeck et al. 2021	Alicellidae	Paralicella	Paralicella tenuipes		Clifton Nunnally	20-Mar-2015	Pacific Ocean	CP	Clarion Clipperton Zone	Area of Particular Environmental Interest	Stratum A	19.451	-120.053	4057	Baited trap	APEI-4 Stratum A
SCAP	SCAP077-16	AB1-AMP129	BOLD:ACZ6441			MW057027	Paralicella tenuipes	Deutsches Zentrum fuer Marine Biodiversitaetsforschung	Mohrbeck et al. 2021	Alicellidae	Paralicella	Paralicella tenuipes		Jeffrey Drazen, Clifton Nunnally	10-Oct-2013	Pacific Ocean	CP	northeast equatorial|Clarion Clipperton Zone	UK-1 lease block	Stratum A	13.85	-116.623	4082	Baited trap	B
SCAP	SCAP076-16	AB1-AMP127	BOLD:ACZ6237			MW056844	Paralicella tenuipes	National Oceanography Center, Southampton	Mohrbeck et al. 2021	Alicellidae	Paralicella	Paralicella tenuipes		Jeffrey Drazen, Clifton Nunnally	10-Oct-2013	Pacific Ocean	CP	northeast equatorial|Clarion Clipperton Zone	UK-1 lease block	Stratum A	13.85	-116.623	4082	Baited trap	B
SCAP	SCAP686-16	AB2-AMP3883	BOLD:ACZ6441			MW056728	Paralicella tenuipes	Deutsches Zentrum fuer Marine Biodiversitaetsforschung	Mohrbeck et al. 2021	Alicellidae	Paralicella	Paralicella tenuipes		Clifton Nunnally	20-Mar-2015	Pacific Ocean	CP	Clarion Clipperton Zone	Area of Particular Environmental Interest	Stratum A	19.451	-120.053	4057	Baited trap	APEI-4 Stratum A
SCAP	SCAP683-16	AB2-AMP3876	BOLD:ACZ6441	MZ655906	MZ655954	MW056889	Paralicella tenuipes	Deutsches Zentrum fuer Marine Biodiversitaetsforschung	Mohrbeck et al. 2021	Alicellidae	Paralicella	Paralicella tenuipes		Clifton Nunnally	20-Mar-2015	Pacific Ocean	CP	Clarion Clipperton Zone	Area of Particular Environmental Interest	Stratum A	19.451	-120.053	4057	Baited trap	APEI-4 Stratum A
SCAP	SCAP070-16	AB1-AMP117	BOLD:ACZ6236			MW057152	Paralicella tenuipes	National Oceanography Center, Southampton	Mohrbeck et al. 2021	Alicellidae	Paralicella	Paralicella tenuipes		Jeffrey Drazen, Clifton Nunnally	10-Oct-2013	Pacific Ocean	CP	northeast equatorial|Clarion Clipperton Zone	UK-1 lease block	Stratum A	13.85	-116.623	4082	Baited trap	B
SCAP	SCAP679-16	AB2-AMP3860	BOLD:ACZ6236			MW057089	Paralicella tenuipes	Deutsches Zentrum fuer Marine Biodiversitaetsforschung	Mohrbeck et al. 2021	Alicellidae	Paralicella	Paralicella tenuipes		Clifton Nunnally	20-Mar-2015	Pacific Ocean	CP	Clarion Clipperton Zone	Area of Particular Environmental Interest	Stratum A	19.451	-120.053	4057	Baited trap	APEI-4 Stratum A
SCAP	SCAP067-16	AB1-AMP114	BOLD:ACZ6237			MW057063	Paralicella tenuipes	Deutsches Zentrum fuer Marine Biodiversitaetsforschung	Mohrbeck et al. 2021	Alicellidae	Paralicella	Paralicella tenuipes		Jeffrey Drazen, Clifton Nunnally	10-Oct-2013	Pacific Ocean	CP	northeast equatorial|Clarion Clipperton Zone	UK-1 lease block	Stratum A	13.85	-116.623	4082	Baited trap	B
SCAP	SCAP674-16	AB2-AMP3694	BOLD:ACZ6237			MW057139	Paralicella tenuipes	Deutsches Zentrum fuer Marine Biodiversitaetsforschung	Mohrbeck et al. 2021	Alicellidae	Paralicella	Paralicella tenuipes		Clifton Nunnally	13-Mar-2015	Pacific Ocean	CP	Clarion Clipperton Zone	OMS-1 exploration area	Stratum A	12.055	-117.227	4071	Baited trap	OMS-1 Stratum A
SCAP	SCAP673-16	AB2-AMP3692	BOLD:ACZ6237			MW056519	Paralicella tenuipes	Deutsches Zentrum fuer Marine Biodiversitaetsforschung	Mohrbeck et al. 2021	Alicellidae	Paralicella	Paralicella tenuipes		Clifton Nunnally	13-Mar-2015	Pacific Ocean	CP	Clarion Clipperton Zone	OMS-1 exploration area	Stratum A	12.055	-117.227	4071	Baited trap	OMS-1 Stratum A
SCAP	SCAP671-16	AB2-AMP3681	BOLD:ACZ6237			MW056605	Paralicella tenuipes	Deutsches Zentrum fuer Marine Biodiversitaetsforschung	Mohrbeck et al. 2021	Alicellidae	Paralicella	Paralicella tenuipes		Clifton Nunnally	13-Mar-2015	Pacific Ocean	CP	Clarion Clipperton Zone	OMS-1 exploration area	Stratum A	12.055	-117.227	4071	Baited trap	OMS-1 Stratum A
SCAP	SCAP670-16	AB2-AMP3680	BOLD:ACZ6237			MW056758	Paralicella tenuipes	Deutsches Zentrum fuer Marine Biodiversitaetsforschung	Mohrbeck et al. 2021	Alicellidae	Paralicella	Paralicella tenuipes		Clifton Nunnally	13-Mar-2015	Pacific Ocean	CP	Clarion Clipperton Zone	OMS-1 exploration area	Stratum A	12.055	-117.227	4071	Baited trap	OMS-1 Stratum A
SCAP	SCAP058-16	AB1-AMP73	BOLD:ACZ6237			MW056978	Paralicella tenuipes	Deutsches Zentrum fuer Marine Biodiversitaetsforschung	Mohrbeck et al. 2021	Alicellidae	Paralicella	Paralicella tenuipes		Jeffrey Drazen, Clifton Nunnally	08-Oct-2013	Pacific Ocean	CP	northeast equatorial|Clarion Clipperton Zone	UK-1 lease block	Stratum A	13.881	-116.449	4203	Baited trap	A
SCAP	SCAP051-16	AB1-AMP63	BOLD:ACZ6441			MW056533	Paralicella tenuipes	Deutsches Zentrum fuer Marine Biodiversitaetsforschung	Mohrbeck et al. 2021	Alicellidae	Paralicella	Paralicella tenuipes		Jeffrey Drazen, Clifton Nunnally	08-Oct-2013	Pacific Ocean	CP	northeast equatorial|Clarion Clipperton Zone	UK-1 lease block	Stratum A	13.881	-116.449	4203	Baited trap	A
SCAP	SCAP045-16	AB1-AMP57	BOLD:ACZ6237			MW056649	Paralicella tenuipes	Deutsches Zentrum fuer Marine Biodiversitaetsforschung	Mohrbeck et al. 2021	Alicellidae	Paralicella	Paralicella tenuipes		Jeffrey Drazen, Clifton Nunnally	08-Oct-2013	Pacific Ocean	CP	northeast equatorial|Clarion Clipperton Zone	UK-1 lease block	Stratum A	13.881	-116.449	4203	Baited trap	A
SCAP	SCAP654-16	AB2-AMP3653	BOLD:ACZ6237			MW056816	Paralicella tenuipes	Deutsches Zentrum fuer Marine Biodiversitaetsforschung	Mohrbeck et al. 2021	Alicellidae	Paralicella	Paralicella tenuipes		Clifton Nunnally	13-Mar-2015	Pacific Ocean	CP	Clarion Clipperton Zone	OMS-1 exploration area	Stratum A	12.055	-117.227	4071	Baited trap	OMS-1 Stratum A
SCAP	SCAP652-16	AB2-AMP3651	BOLD:ACZ6441			MW056711	Paralicella tenuipes	Deutsches Zentrum fuer Marine Biodiversitaetsforschung	Mohrbeck et al. 2021	Alicellidae	Paralicella	Paralicella tenuipes		Clifton Nunnally	13-Mar-2015	Pacific Ocean	CP	Clarion Clipperton Zone	OMS-1 exploration area	Stratum A	12.055	-117.227	4071	Baited trap	OMS-1 Stratum A
SCAP	SCAP040-16	AB1-AMP51	BOLD:ACZ6441			MW056685	Paralicella tenuipes	Deutsches Zentrum fuer Marine Biodiversitaetsforschung	Mohrbeck et al. 2021	Alicellidae	Paralicella	Paralicella tenuipes		Jeffrey Drazen, Clifton Nunnally	08-Oct-2013	Pacific Ocean	CP	northeast equatorial|Clarion Clipperton Zone	UK-1 lease block	Stratum A	13.881	-116.449	4203	Baited trap	A
SCAP	SCAP038-16	AB1-AMP49	BOLD:ACZ6237		MZ655935	MW056740	Paralicella tenuipes	Deutsches Zentrum fuer Marine Biodiversitaetsforschung	Mohrbeck et al. 2021	Alicellidae	Paralicella	Paralicella tenuipes		Jeffrey Drazen, Clifton Nunnally	08-Oct-2013	Pacific Ocean	CP	northeast equatorial|Clarion Clipperton Zone	UK-1 lease block	Stratum A	13.881	-116.449	4203	Baited trap	A
SCAP	SCAP645-16	AB2-AMP2288	BOLD:ACZ6441			MW056564	Paralicella tenuipes	Deutsches Zentrum fuer Marine Biodiversitaetsforschung	Mohrbeck et al. 2021	Alicellidae	Paralicella	Paralicella tenuipes		Clifton Nunnally	24-Feb-2015	Pacific Ocean	CP	Clarion Clipperton Zone	OMS-1 exploration area	Stratum A	12.118	-117.35	4183	Baited trap	OMS-1 Stratum A
SCAP	SCAP642-16	AB2-AMP2284	BOLD:ACZ6236			MW056780	Paralicella tenuipes	Deutsches Zentrum fuer Marine Biodiversitaetsforschung	Mohrbeck et al. 2021	Alicellidae	Paralicella	Paralicella tenuipes		Clifton Nunnally	24-Feb-2015	Pacific Ocean	CP	Clarion Clipperton Zone	OMS-1 exploration area	Stratum A	12.118	-117.35	4183	Baited trap	OMS-1 Stratum A
SCAP	SCAP641-16	AB2-AMP2281	BOLD:ACZ6237			MW057148	Paralicella tenuipes	Deutsches Zentrum fuer Marine Biodiversitaetsforschung	Mohrbeck et al. 2021	Alicellidae	Paralicella	Paralicella tenuipes		Clifton Nunnally	24-Feb-2015	Pacific Ocean	CP	Clarion Clipperton Zone	OMS-1 exploration area	Stratum A	12.118	-117.35	4183	Baited trap	OMS-1 Stratum A
SCAP	SCAP638-16	AB2-AMP2263	BOLD:ACZ6441			MW056705	Paralicella tenuipes	Deutsches Zentrum fuer Marine Biodiversitaetsforschung	Mohrbeck et al. 2021	Alicellidae	Paralicella	Paralicella tenuipes		Clifton Nunnally	24-Feb-2015	Pacific Ocean	CP	Clarion Clipperton Zone	OMS-1 exploration area	Stratum A	12.118	-117.35	4183	Baited trap	OMS-1 Stratum A
SCAP	SCAP026-16	AB1-AMP32	BOLD:ACZ6235	MZ655907	MZ655955	MW056910	Paralicella tenuipes	National Oceanography Center, Southampton	Mohrbeck et al. 2021	Alicellidae	Paralicella	Paralicella tenuipes		Jeffrey Drazen, Clifton Nunnally	08-Oct-2013	Pacific Ocean	CP	northeast equatorial|Clarion Clipperton Zone	UK-1 lease block	Stratum A	13.881	-116.449	4203	Baited trap	A
SCAP	SCAP025-16	AB1-AMP31	BOLD:ACZ6441			MW057067	Paralicella tenuipes	Deutsches Zentrum fuer Marine Biodiversitaetsforschung	Mohrbeck et al. 2021	Alicellidae	Paralicella	Paralicella tenuipes		Jeffrey Drazen, Clifton Nunnally	08-Oct-2013	Pacific Ocean	CP	northeast equatorial|Clarion Clipperton Zone	UK-1 lease block	Stratum A	13.881	-116.449	4203	Baited trap	A
SCAP	SCAP024-16	AB1-AMP30	BOLD:ACZ6441			MW056572	Paralicella tenuipes	National Oceanography Center, Southampton	Mohrbeck et al. 2021	Alicellidae	Paralicella	Paralicella tenuipes		Jeffrey Drazen, Clifton Nunnally	08-Oct-2013	Pacific Ocean	CP	northeast equatorial|Clarion Clipperton Zone	UK-1 lease block	Stratum A	13.881	-116.449	4203	Baited trap	A
SCAP	SCAP634-16	AB2-AMP2257	BOLD:ACZ6237			MW056626	Paralicella tenuipes	Deutsches Zentrum fuer Marine Biodiversitaetsforschung	Mohrbeck et al. 2021	Alicellidae	Paralicella	Paralicella tenuipes		Clifton Nunnally	24-Feb-2015	Pacific Ocean	CP	Clarion Clipperton Zone	OMS-1 exploration area	Stratum A	12.118	-117.35	4183	Baited trap	OMS-1 Stratum A
SCAP	SCAP633-16	AB2-AMP2256	BOLD:ACZ6237			MW056897	Paralicella tenuipes	Deutsches Zentrum fuer Marine Biodiversitaetsforschung	Mohrbeck et al. 2021	Alicellidae	Paralicella	Paralicella tenuipes		Clifton Nunnally	24-Feb-2015	Pacific Ocean	CP	Clarion Clipperton Zone	OMS-1 exploration area	Stratum A	12.118	-117.35	4183	Baited trap	OMS-1 Stratum A
SCAP	SCAP021-16	AB1-AMP26	BOLD:ACZ6441			MW057105	Paralicella tenuipes	Deutsches Zentrum fuer Marine Biodiversitaetsforschung	Mohrbeck et al. 2021	Alicellidae	Paralicella	Paralicella tenuipes		Jeffrey Drazen, Clifton Nunnally	08-Oct-2013	Pacific Ocean	CP	northeast equatorial|Clarion Clipperton Zone	UK-1 lease block	Stratum A	13.881	-116.449	4203	Baited trap	A
SCAP	SCAP629-16	AB2-AMP2246	BOLD:ACZ6441			MW056627	Paralicella tenuipes	Deutsches Zentrum fuer Marine Biodiversitaetsforschung	Mohrbeck et al. 2021	Alicellidae	Paralicella	Paralicella tenuipes		Clifton Nunnally	24-Feb-2015	Pacific Ocean	CP	Clarion Clipperton Zone	OMS-1 exploration area	Stratum A	12.118	-117.35	4183	Baited trap	OMS-1 Stratum A
SCAP	SCAP445-16	AB1-AMP637	BOLD:ACZ4489			MW056535	Paralicella caperesca	National Oceanography Center, Southampton	Mohrbeck et al. 2021	Alicellidae	Paralicella	Paralicella caperesca		Jeffrey Drazen, Clifton Nunnally	10-Oct-2013	Pacific Ocean	CP	northeast equatorial|Clarion Clipperton Zone	UK-1 lease block	Stratum A	13.85	-116.623	4082	Baited trap	B
SCAP	SCAP542-16	AB2-AMP723	BOLD:ACZ5629			MW056774	Paralicella caperesca	Deutsches Zentrum fuer Marine Biodiversitaetsforschung	Mohrbeck et al. 2021	Alicellidae	Paralicella	Paralicella caperesca		Clifton Nunnally	18-Feb-2015	Pacific Ocean	CP	Clarion Clipperton Zone	UK-1 exploration area	Stratum B	12.384	-116.491	4149	Baited trap	UK-1 Stratum B
SCAP	SCAP440-16	AB1-AMP630	BOLD:ACZ5625			MW056891	Paralicella caperesca	Deutsches Zentrum fuer Marine Biodiversitaetsforschung	Mohrbeck et al. 2021	Alicellidae	Paralicella	Paralicella caperesca		Jeffrey Drazen, Clifton Nunnally	10-Oct-2013	Pacific Ocean	CP	northeast equatorial|Clarion Clipperton Zone	UK-1 lease block	Stratum A	13.85	-116.623	4082	Baited trap	B
SCAP	SCAP439-16	AB1-AMP629	BOLD:ACZ5629			MW056996	Paralicella caperesca	Deutsches Zentrum fuer Marine Biodiversitaetsforschung	Mohrbeck et al. 2021	Alicellidae	Paralicella	Paralicella caperesca		Jeffrey Drazen, Clifton Nunnally	10-Oct-2013	Pacific Ocean	CP	northeast equatorial|Clarion Clipperton Zone	UK-1 lease block	Stratum A	13.85	-116.623	4082	Baited trap	B
SCAP	SCAP537-16	AB2-AMP702	BOLD:ACZ5629			MW056733	Paralicella caperesca	Deutsches Zentrum fuer Marine Biodiversitaetsforschung	Mohrbeck et al. 2021	Alicellidae	Paralicella	Paralicella caperesca		Clifton Nunnally	18-Feb-2015	Pacific Ocean	CP	Clarion Clipperton Zone	UK-1 exploration area	Stratum B	12.384	-116.491	4149	Baited trap	UK-1 Stratum B
SCAP	SCAP437-16	AB1-AMP624	BOLD:ACZ5628			MW056945	Paralicella caperesca	Deutsches Zentrum fuer Marine Biodiversitaetsforschung	Mohrbeck et al. 2021	Alicellidae	Paralicella	Paralicella caperesca		Jeffrey Drazen, Clifton Nunnally	10-Oct-2013	Pacific Ocean	CP	northeast equatorial|Clarion Clipperton Zone	UK-1 lease block	Stratum A	13.85	-116.623	4082	Baited trap	B
SCAP	SCAP535-16	AB2-AMP689	BOLD:ACZ5628			MW056596	Paralicella caperesca	Deutsches Zentrum fuer Marine Biodiversitaetsforschung	Mohrbeck et al. 2021	Alicellidae	Paralicella	Paralicella caperesca		Clifton Nunnally	20-Mar-2015	Pacific Ocean	CP	Clarion Clipperton Zone	Area of Particular Environmental Interest	Stratum A	19.451	-120.053	4057	Baited trap	APEI-6 Stratum A
SCAP	SCAP432-16	AB1-AMP618	BOLD:ACZ5625			MW056513	Paralicella caperesca	Deutsches Zentrum fuer Marine Biodiversitaetsforschung	Mohrbeck et al. 2021	Alicellidae	Paralicella	Paralicella caperesca		Jeffrey Drazen, Clifton Nunnally	10-Oct-2013	Pacific Ocean	CP	northeast equatorial|Clarion Clipperton Zone	UK-1 lease block	Stratum A	13.85	-116.623	4082	Baited trap	B
SCAP	SCAP527-16	AB2-AMP86	BOLD:ACZ5629			MW056917	Paralicella caperesca	Deutsches Zentrum fuer Marine Biodiversitaetsforschung	Mohrbeck et al. 2021	Alicellidae	Paralicella	Paralicella caperesca		Clifton Nunnally	18-Feb-2015	Pacific Ocean	CP	Clarion Clipperton Zone	UK-1 exploration area	Stratum B	12.384	-116.491	4149	Baited trap	UK-1 Stratum B
SCAP	SCAP425-16	AB1-AMP611	BOLD:ACZ4489			MW056588	Paralicella caperesca	Deutsches Zentrum fuer Marine Biodiversitaetsforschung	Mohrbeck et al. 2021	Alicellidae	Paralicella	Paralicella caperesca		Jeffrey Drazen, Clifton Nunnally	10-Oct-2013	Pacific Ocean	CP	northeast equatorial|Clarion Clipperton Zone	UK-1 lease block	Stratum A	13.85	-116.623	4082	Baited trap	B
SCAP	SCAP523-16	AB2-AMP76	BOLD:ACZ5625			MW057130	Paralicella caperesca	Deutsches Zentrum fuer Marine Biodiversitaetsforschung	Mohrbeck et al. 2021	Alicellidae	Paralicella	Paralicella caperesca		Clifton Nunnally	18-Feb-2015	Pacific Ocean	CP	Clarion Clipperton Zone	UK-1 exploration area	Stratum B	12.384	-116.491	4149	Baited trap	UK-1 Stratum B
SCAP	SCAP423-16	AB1-AMP609	BOLD:ACZ4905			MW057143	Paralicella caperesca	Deutsches Zentrum fuer Marine Biodiversitaetsforschung	Mohrbeck et al. 2021	Alicellidae	Paralicella	Paralicella caperesca		Jeffrey Drazen, Clifton Nunnally	10-Oct-2013	Pacific Ocean	CP	northeast equatorial|Clarion Clipperton Zone	UK-1 lease block	Stratum A	13.85	-116.623	4082	Baited trap	B
SCAP	SCAP422-16	AB1-AMP607	BOLD:ACZ4489			MW056604	Paralicella caperesca	Deutsches Zentrum fuer Marine Biodiversitaetsforschung	Mohrbeck et al. 2021	Alicellidae	Paralicella	Paralicella caperesca		Jeffrey Drazen, Clifton Nunnally	10-Oct-2013	Pacific Ocean	CP	northeast equatorial|Clarion Clipperton Zone	UK-1 lease block	Stratum A	13.85	-116.623	4082	Baited trap	B
SCAP	SCAP421-16	AB1-AMP606	BOLD:ACZ5625			MW056697	Paralicella caperesca	National Oceanography Center, Southampton	Mohrbeck et al. 2021	Alicellidae	Paralicella	Paralicella caperesca		Jeffrey Drazen, Clifton Nunnally	10-Oct-2013	Pacific Ocean	CP	northeast equatorial|Clarion Clipperton Zone	UK-1 lease block	Stratum A	13.85	-116.623	4082	Baited trap	B
SCAP	SCAP517-16	AB2-AMP63	BOLD:ACZ5625			MW056642	Paralicella caperesca	Deutsches Zentrum fuer Marine Biodiversitaetsforschung	Mohrbeck et al. 2021	Alicellidae	Paralicella	Paralicella caperesca		Clifton Nunnally	18-Feb-2015	Pacific Ocean	CP	Clarion Clipperton Zone	UK-1 exploration area	Stratum B	12.384	-116.491	4149	Baited trap	UK-1 Stratum B
SCAP	SCAP417-16	AB1-AMP600	BOLD:ACZ5625			MW057075	Paralicella caperesca	Deutsches Zentrum fuer Marine Biodiversitaetsforschung	Mohrbeck et al. 2021	Alicellidae	Paralicella	Paralicella caperesca		Jeffrey Drazen, Clifton Nunnally	10-Oct-2013	Pacific Ocean	CP	northeast equatorial|Clarion Clipperton Zone	UK-1 lease block	Stratum A	13.85	-116.623	4082	Baited trap	B
SCAP	SCAP414-16	AB1-AMP596	BOLD:ACZ5625			MW057153	Paralicella caperesca	Deutsches Zentrum fuer Marine Biodiversitaetsforschung	Mohrbeck et al. 2021	Alicellidae	Paralicella	Paralicella caperesca		Jeffrey Drazen, Clifton Nunnally	10-Oct-2013	Pacific Ocean	CP	northeast equatorial|Clarion Clipperton Zone	UK-1 lease block	Stratum A	13.85	-116.623	4082	Baited trap	B
SCAP	SCAP510-16	AB2-AMP54	BOLD:ACZ5629			MW057036	Paralicella caperesca	Deutsches Zentrum fuer Marine Biodiversitaetsforschung	Mohrbeck et al. 2021	Alicellidae	Paralicella	Paralicella caperesca		Clifton Nunnally	18-Feb-2015	Pacific Ocean	CP	Clarion Clipperton Zone	UK-1 exploration area	Stratum B	12.384	-116.491	4149	Baited trap	UK-1 Stratum B
SCAP	SCAP508-16	AB2-AMP48	BOLD:ACZ5629			MW056574	Paralicella caperesca	Deutsches Zentrum fuer Marine Biodiversitaetsforschung	Mohrbeck et al. 2021	Alicellidae	Paralicella	Paralicella caperesca		Clifton Nunnally	18-Feb-2015	Pacific Ocean	CP	Clarion Clipperton Zone	UK-1 exploration area	Stratum B	12.384	-116.491	4149	Baited trap	UK-1 Stratum B
SCAP	SCAP407-16	AB1-AMP585	BOLD:ACZ5625			MW056644	Paralicella caperesca	Deutsches Zentrum fuer Marine Biodiversitaetsforschung	Mohrbeck et al. 2021	Alicellidae	Paralicella	Paralicella caperesca		Jeffrey Drazen, Clifton Nunnally	10-Oct-2013	Pacific Ocean	CP	northeast equatorial|Clarion Clipperton Zone	UK-1 lease block	Stratum A	13.85	-116.623	4082	Baited trap	B
SCAP	SCAP505-16	AB2-AMP44	BOLD:ACZ5629			MW056525	Paralicella caperesca	Deutsches Zentrum fuer Marine Biodiversitaetsforschung	Mohrbeck et al. 2021	Alicellidae	Paralicella	Paralicella caperesca		Clifton Nunnally	18-Feb-2015	Pacific Ocean	CP	Clarion Clipperton Zone	UK-1 exploration area	Stratum B	12.384	-116.491	4149	Baited trap	UK-1 Stratum B
SCAP	SCAP503-16	AB2-AMP42	BOLD:ACZ5625			MW056861	Paralicella caperesca	Deutsches Zentrum fuer Marine Biodiversitaetsforschung	Mohrbeck et al. 2021	Alicellidae	Paralicella	Paralicella caperesca		Clifton Nunnally	18-Feb-2015	Pacific Ocean	CP	Clarion Clipperton Zone	UK-1 exploration area	Stratum B	12.384	-116.491	4149	Baited trap	UK-1 Stratum B
SCAP	SCAP497-16	AB2-AMP36	BOLD:ACZ5625			MW057060	Paralicella caperesca	Deutsches Zentrum fuer Marine Biodiversitaetsforschung	Mohrbeck et al. 2021	Alicellidae	Paralicella	Paralicella caperesca		Clifton Nunnally	18-Feb-2015	Pacific Ocean	CP	Clarion Clipperton Zone	UK-1 exploration area	Stratum B	12.384	-116.491	4149	Baited trap	UK-1 Stratum B
SCAP	SCAP397-16	AB1-AMP570	BOLD:ACZ4905			MW056704	Paralicella caperesca	National Oceanography Center, Southampton	Mohrbeck et al. 2021	Alicellidae	Paralicella	Paralicella caperesca		Jeffrey Drazen, Clifton Nunnally	10-Oct-2013	Pacific Ocean	CP	northeast equatorial|Clarion Clipperton Zone	UK-1 lease block	Stratum A	13.85	-116.623	4082	Baited trap	B
SCAP	SCAP495-16	AB2-AMP34	BOLD:ACZ5625			MW056952	Paralicella caperesca	Deutsches Zentrum fuer Marine Biodiversitaetsforschung	Mohrbeck et al. 2021	Alicellidae	Paralicella	Paralicella caperesca		Clifton Nunnally	18-Feb-2015	Pacific Ocean	CP	Clarion Clipperton Zone	UK-1 exploration area	Stratum B	12.384	-116.491	4149	Baited trap	UK-1 Stratum B
SCAP	SCAP393-16	AB1-AMP561	BOLD:ACZ4905			MW057123	Paralicella caperesca	National Oceanography Center, Southampton	Mohrbeck et al. 2021	Alicellidae	Paralicella	Paralicella caperesca		Jeffrey Drazen, Clifton Nunnally	10-Oct-2013	Pacific Ocean	CP	northeast equatorial|Clarion Clipperton Zone	UK-1 lease block	Stratum A	13.85	-116.623	4082	Baited trap	B
SCAP	SCAP677-16	AB2-AMP3855	BOLD:ACZ5627			MW056919	Paralicella caperesca	Deutsches Zentrum fuer Marine Biodiversitaetsforschung	Mohrbeck et al. 2021	Alicellidae	Paralicella	Paralicella caperesca		Clifton Nunnally	20-Mar-2015	Pacific Ocean	CP	Clarion Clipperton Zone	Area of Particular Environmental Interest	Stratum A	19.451	-120.053	4057	Baited trap	APEI-4 Stratum A
SCAP	SCAP386-16	AB1-AMP550	BOLD:ACZ4489			MW057046	Paralicella caperesca	Deutsches Zentrum fuer Marine Biodiversitaetsforschung	Mohrbeck et al. 2021	Alicellidae	Paralicella	Paralicella caperesca		Jeffrey Drazen, Clifton Nunnally	10-Oct-2013	Pacific Ocean	CP	northeast equatorial|Clarion Clipperton Zone	UK-1 lease block	Stratum A	13.85	-116.623	4082	Baited trap	B
SCAP	SCAP676-16	AB2-AMP3854	BOLD:ACZ6571			MW056666	Paralicella caperesca	Deutsches Zentrum fuer Marine Biodiversitaetsforschung	Mohrbeck et al. 2021	Alicellidae	Paralicella	Paralicella caperesca		Clifton Nunnally	20-Mar-2015	Pacific Ocean	CP	Clarion Clipperton Zone	Area of Particular Environmental Interest	Stratum A	19.451	-120.053	4057	Baited trap	APEI-6 Stratum A
SCAP	SCAP033-16	AB1-AMP41	BOLD:ACZ6571	MZ655910	MZ655967	MW057131	Paralicella caperesca	National Oceanography Center, Southampton	Mohrbeck et al. 2021	Alicellidae	Paralicella	Paralicella caperesca		Jeffrey Drazen, Clifton Nunnally	08-Oct-2013	Pacific Ocean	CP	northeast equatorial|Clarion Clipperton Zone	UK-1 lease block	Stratum A	13.881	-116.449	4203	Baited trap	A
SCAP	SCAP474-16	AB2-AMP7	BOLD:ACZ5625			MW057050	Paralicella caperesca	Deutsches Zentrum fuer Marine Biodiversitaetsforschung	Mohrbeck et al. 2021	Alicellidae	Paralicella	Paralicella caperesca		Clifton Nunnally	18-Feb-2015	Pacific Ocean	CP	Clarion Clipperton Zone	UK-1 exploration area	Stratum B	12.384	-116.491	4149	Baited trap	UK-1 Stratum B
SCAP	SCAP472-16	AB2-AMP3	BOLD:ACZ5629			MW056777	Paralicella caperesca	Deutsches Zentrum fuer Marine Biodiversitaetsforschung	Mohrbeck et al. 2021	Alicellidae	Paralicella	Paralicella caperesca		Clifton Nunnally	18-Feb-2015	Pacific Ocean	CP	Clarion Clipperton Zone	UK-1 exploration area	Stratum B	12.384	-116.491	4149	Baited trap	UK-1 Stratum B
SCAP	SCAP470-16	AB2-AMP1	BOLD:ACZ5629			MW057001	Paralicella caperesca	Deutsches Zentrum fuer Marine Biodiversitaetsforschung	Mohrbeck et al. 2021	Alicellidae	Paralicella	Paralicella caperesca		Clifton Nunnally	18-Feb-2015	Pacific Ocean	CP	Clarion Clipperton Zone	UK-1 exploration area	Stratum B	12.384	-116.491	4149	Baited trap	UK-1 Stratum B
SCAP	SCAP368-16	AB1-AMP525	BOLD:ACZ4489			MW056669	Paralicella caperesca	National Oceanography Center, Southampton	Mohrbeck et al. 2021	Alicellidae	Paralicella	Paralicella caperesca		Jeffrey Drazen, Clifton Nunnally	10-Oct-2013	Pacific Ocean	CP	northeast equatorial|Clarion Clipperton Zone	UK-1 lease block	Stratum A	13.85	-116.623	4082	Baited trap	B
SCAP	SCAP366-16	AB1-AMP523	BOLD:ACZ5630			MW056901	Paralicella caperesca	National Oceanography Center, Southampton	Mohrbeck et al. 2021	Alicellidae	Paralicella	Paralicella caperesca		Jeffrey Drazen, Clifton Nunnally	10-Oct-2013	Pacific Ocean	CP	northeast equatorial|Clarion Clipperton Zone	UK-1 lease block	Stratum A	13.85	-116.623	4082	Baited trap	B
SCAP	SCAP365-16	AB1-AMP522	BOLD:ACZ4489			MW057015	Paralicella caperesca	Deutsches Zentrum fuer Marine Biodiversitaetsforschung	Mohrbeck et al. 2021	Alicellidae	Paralicella	Paralicella caperesca		Jeffrey Drazen, Clifton Nunnally	10-Oct-2013	Pacific Ocean	CP	northeast equatorial|Clarion Clipperton Zone	UK-1 lease block	Stratum A	13.85	-116.623	4082	Baited trap	B
SCAP	SCAP361-16	AB1-AMP517	BOLD:ACZ5629			MW056921	Paralicella caperesca	National Oceanography Center, Southampton	Mohrbeck et al. 2021	Alicellidae	Paralicella	Paralicella caperesca		Jeffrey Drazen, Clifton Nunnally	10-Oct-2013	Pacific Ocean	CP	northeast equatorial|Clarion Clipperton Zone	UK-1 lease block	Stratum A	13.85	-116.623	4082	Baited trap	B
SCAP	SCAP354-16	AB1-AMP509	BOLD:ACZ4489			MW056738	Paralicella caperesca	Deutsches Zentrum fuer Marine Biodiversitaetsforschung	Mohrbeck et al. 2021	Alicellidae	Paralicella	Paralicella caperesca		Jeffrey Drazen, Clifton Nunnally	10-Oct-2013	Pacific Ocean	CP	northeast equatorial|Clarion Clipperton Zone	UK-1 lease block	Stratum A	13.85	-116.623	4082	Baited trap	B
SCAP	SCAP345-16	AB1-AMP500	BOLD:ACZ4904			MW056838	Paralicella caperesca	National Oceanography Center, Southampton	Mohrbeck et al. 2021	Alicellidae	Paralicella	Paralicella caperesca		Jeffrey Drazen, Clifton Nunnally	10-Oct-2013	Pacific Ocean	CP	northeast equatorial|Clarion Clipperton Zone	UK-1 lease block	Stratum A	13.85	-116.623	4082	Baited trap	B
SCAP	SCAP343-16	AB1-AMP497	BOLD:ACZ5625			MW057002	Paralicella caperesca	Deutsches Zentrum fuer Marine Biodiversitaetsforschung	Mohrbeck et al. 2021	Alicellidae	Paralicella	Paralicella caperesca		Jeffrey Drazen, Clifton Nunnally	10-Oct-2013	Pacific Ocean	CP	northeast equatorial|Clarion Clipperton Zone	UK-1 lease block	Stratum A	13.85	-116.623	4082	Baited trap	B
SCAP	SCAP339-16	AB1-AMP493	BOLD:ACZ4489			MW056868	Paralicella caperesca	Deutsches Zentrum fuer Marine Biodiversitaetsforschung	Mohrbeck et al. 2021	Alicellidae	Paralicella	Paralicella caperesca		Jeffrey Drazen, Clifton Nunnally	10-Oct-2013	Pacific Ocean	CP	northeast equatorial|Clarion Clipperton Zone	UK-1 lease block	Stratum A	13.85	-116.623	4082	Baited trap	B
SCAP	SCAP334-16	AB1-AMP487	BOLD:ACZ5630			MW057059	Paralicella caperesca	National Oceanography Center, Southampton	Mohrbeck et al. 2021	Alicellidae	Paralicella	Paralicella caperesca		Jeffrey Drazen, Clifton Nunnally	10-Oct-2013	Pacific Ocean	CP	northeast equatorial|Clarion Clipperton Zone	UK-1 lease block	Stratum A	13.85	-116.623	4082	Baited trap	B
SCAP	SCAP565-16	AB2-AMP1539	BOLD:ACZ5625			MW056981	Paralicella caperesca	Deutsches Zentrum fuer Marine Biodiversitaetsforschung	Mohrbeck et al. 2021	Alicellidae	Paralicella	Paralicella caperesca		Clifton Nunnally	21-Feb-2015	Pacific Ocean	CP	Clarion Clipperton Zone	UK-1 exploration area	Stratum B	12.563	-116.717	4193	Baited trap	UK-1 Stratum B
SCAP	SCAP306-16	AB1-AMP451	BOLD:ACZ4489			MW056922	Paralicella caperesca	Deutsches Zentrum fuer Marine Biodiversitaetsforschung	Mohrbeck et al. 2021	Alicellidae	Paralicella	Paralicella caperesca		Jeffrey Drazen, Clifton Nunnally	10-Oct-2013	Pacific Ocean	CP	northeast equatorial|Clarion Clipperton Zone	UK-1 lease block	Stratum A	13.85	-116.623	4082	Baited trap	B
SCAP	SCAP303-16	AB1-AMP448	BOLD:ACZ4489			MW056722	Paralicella caperesca	Deutsches Zentrum fuer Marine Biodiversitaetsforschung	Mohrbeck et al. 2021	Alicellidae	Paralicella	Paralicella caperesca		Jeffrey Drazen, Clifton Nunnally	10-Oct-2013	Pacific Ocean	CP	northeast equatorial|Clarion Clipperton Zone	UK-1 lease block	Stratum A	13.85	-116.623	4082	Baited trap	B
SCAP	SCAP300-16	AB1-AMP445	BOLD:ACZ4489			MW056885	Paralicella caperesca	Deutsches Zentrum fuer Marine Biodiversitaetsforschung	Mohrbeck et al. 2021	Alicellidae	Paralicella	Paralicella caperesca		Jeffrey Drazen, Clifton Nunnally	10-Oct-2013	Pacific Ocean	CP	northeast equatorial|Clarion Clipperton Zone	UK-1 lease block	Stratum A	13.85	-116.623	4082	Baited trap	B
SCAP	SCAP297-16	AB1-AMP439	BOLD:ACZ4489			MW056524	Paralicella caperesca	Deutsches Zentrum fuer Marine Biodiversitaetsforschung	Mohrbeck et al. 2021	Alicellidae	Paralicella	Paralicella caperesca		Jeffrey Drazen, Clifton Nunnally	10-Oct-2013	Pacific Ocean	CP	northeast equatorial|Clarion Clipperton Zone	UK-1 lease block	Stratum A	13.85	-116.623	4082	Baited trap	B
SCAP	SCAP295-16	AB1-AMP437	BOLD:ACZ4489			MW056699	Paralicella caperesca	Deutsches Zentrum fuer Marine Biodiversitaetsforschung	Mohrbeck et al. 2021	Alicellidae	Paralicella	Paralicella caperesca		Jeffrey Drazen, Clifton Nunnally	10-Oct-2013	Pacific Ocean	CP	northeast equatorial|Clarion Clipperton Zone	UK-1 lease block	Stratum A	13.85	-116.623	4082	Baited trap	B
SCAP	SCAP280-16	AB1-AMP420	BOLD:ACZ5625			MW056845	Paralicella caperesca	Deutsches Zentrum fuer Marine Biodiversitaetsforschung	Mohrbeck et al. 2021	Alicellidae	Paralicella	Paralicella caperesca		Jeffrey Drazen, Clifton Nunnally	10-Oct-2013	Pacific Ocean	CP	northeast equatorial|Clarion Clipperton Zone	UK-1 lease block	Stratum A	13.85	-116.623	4082	Baited trap	B
SCAP	SCAP272-16	AB1-AMP407	BOLD:ACZ5630			MW056625	Paralicella caperesca	National Oceanography Center, Southampton	Mohrbeck et al. 2021	Alicellidae	Paralicella	Paralicella caperesca		Jeffrey Drazen, Clifton Nunnally	10-Oct-2013	Pacific Ocean	CP	northeast equatorial|Clarion Clipperton Zone	UK-1 lease block	Stratum A	13.85	-116.623	4082	Baited trap	B
SCAP	SCAP259-16	AB1-AMP390	BOLD:ACZ5625			MW056529	Paralicella caperesca	Deutsches Zentrum fuer Marine Biodiversitaetsforschung	Mohrbeck et al. 2021	Alicellidae	Paralicella	Paralicella caperesca		Jeffrey Drazen, Clifton Nunnally	10-Oct-2013	Pacific Ocean	CP	northeast equatorial|Clarion Clipperton Zone	UK-1 lease block	Stratum A	13.85	-116.623	4082	Baited trap	B
SCAP	SCAP258-16	AB1-AMP388	BOLD:ACZ4489			MW057052	Paralicella caperesca	Deutsches Zentrum fuer Marine Biodiversitaetsforschung	Mohrbeck et al. 2021	Alicellidae	Paralicella	Paralicella caperesca		Jeffrey Drazen, Clifton Nunnally	10-Oct-2013	Pacific Ocean	CP	northeast equatorial|Clarion Clipperton Zone	UK-1 lease block	Stratum A	13.85	-116.623	4082	Baited trap	B
SCAP	SCAP252-16	AB1-AMP380	BOLD:ACZ5629			MW056562	Paralicella caperesca	Deutsches Zentrum fuer Marine Biodiversitaetsforschung	Mohrbeck et al. 2021	Alicellidae	Paralicella	Paralicella caperesca		Jeffrey Drazen, Clifton Nunnally	10-Oct-2013	Pacific Ocean	CP	northeast equatorial|Clarion Clipperton Zone	UK-1 lease block	Stratum A	13.85	-116.623	4082	Baited trap	B
SCAP	SCAP250-16	AB1-AMP376	BOLD:ACZ4489			MW056894	Paralicella caperesca	Deutsches Zentrum fuer Marine Biodiversitaetsforschung	Mohrbeck et al. 2021	Alicellidae	Paralicella	Paralicella caperesca		Jeffrey Drazen, Clifton Nunnally	10-Oct-2013	Pacific Ocean	CP	northeast equatorial|Clarion Clipperton Zone	UK-1 lease block	Stratum A	13.85	-116.623	4082	Baited trap	B
SCAP	SCAP233-16	AB1-AMP343	BOLD:ACZ5627			MW056858	Paralicella caperesca	National Oceanography Center, Southampton	Mohrbeck et al. 2021	Alicellidae	Paralicella	Paralicella caperesca		Jeffrey Drazen, Clifton Nunnally	10-Oct-2013	Pacific Ocean	CP	northeast equatorial|Clarion Clipperton Zone	UK-1 lease block	Stratum A	13.85	-116.623	4082	Baited trap	B
SCAP	SCAP230-16	AB1-AMP339	BOLD:ACZ5625			MW057118	Paralicella caperesca	Deutsches Zentrum fuer Marine Biodiversitaetsforschung	Mohrbeck et al. 2021	Alicellidae	Paralicella	Paralicella caperesca		Jeffrey Drazen, Clifton Nunnally	10-Oct-2013	Pacific Ocean	CP	northeast equatorial|Clarion Clipperton Zone	UK-1 lease block	Stratum A	13.85	-116.623	4082	Baited trap	B
SCAP	SCAP227-16	AB1-AMP336	BOLD:ACZ5629			MW057047	Paralicella caperesca	Deutsches Zentrum fuer Marine Biodiversitaetsforschung	Mohrbeck et al. 2021	Alicellidae	Paralicella	Paralicella caperesca		Jeffrey Drazen, Clifton Nunnally	10-Oct-2013	Pacific Ocean	CP	northeast equatorial|Clarion Clipperton Zone	UK-1 lease block	Stratum A	13.85	-116.623	4082	Baited trap	B
SCAP	SCAP226-16	AB1-AMP334	BOLD:ACZ6571			MW056899	Paralicella caperesca	Deutsches Zentrum fuer Marine Biodiversitaetsforschung	Mohrbeck et al. 2021	Alicellidae	Paralicella	Paralicella caperesca		Jeffrey Drazen, Clifton Nunnally	10-Oct-2013	Pacific Ocean	CP	northeast equatorial|Clarion Clipperton Zone	UK-1 lease block	Stratum A	13.85	-116.623	4082	Baited trap	B
SCAP	SCAP218-16	AB1-AMP326	BOLD:ACZ5625			MW056561	Paralicella caperesca	Deutsches Zentrum fuer Marine Biodiversitaetsforschung	Mohrbeck et al. 2021	Alicellidae	Paralicella	Paralicella caperesca		Jeffrey Drazen, Clifton Nunnally	10-Oct-2013	Pacific Ocean	CP	northeast equatorial|Clarion Clipperton Zone	UK-1 lease block	Stratum A	13.85	-116.623	4082	Baited trap	B
SCAP	SCAP214-16	AB1-AMP322	BOLD:ACZ4489			MW057098	Paralicella caperesca	Deutsches Zentrum fuer Marine Biodiversitaetsforschung	Mohrbeck et al. 2021	Alicellidae	Paralicella	Paralicella caperesca		Jeffrey Drazen, Clifton Nunnally	10-Oct-2013	Pacific Ocean	CP	northeast equatorial|Clarion Clipperton Zone	UK-1 lease block	Stratum A	13.85	-116.623	4082	Baited trap	B
SCAP	SCAP211-16	AB1-AMP319	BOLD:ACZ5625			MW056823	Paralicella caperesca	Deutsches Zentrum fuer Marine Biodiversitaetsforschung	Mohrbeck et al. 2021	Alicellidae	Paralicella	Paralicella caperesca		Jeffrey Drazen, Clifton Nunnally	10-Oct-2013	Pacific Ocean	CP	northeast equatorial|Clarion Clipperton Zone	UK-1 lease block	Stratum A	13.85	-116.623	4082	Baited trap	B
SCAP	SCAP210-16	AB1-AMP316	BOLD:ACZ5629			MW056603	Paralicella caperesca	Deutsches Zentrum fuer Marine Biodiversitaetsforschung	Mohrbeck et al. 2021	Alicellidae	Paralicella	Paralicella caperesca		Jeffrey Drazen, Clifton Nunnally	10-Oct-2013	Pacific Ocean	CP	northeast equatorial|Clarion Clipperton Zone	UK-1 lease block	Stratum A	13.85	-116.623	4082	Baited trap	B
SCAP	SCAP052-16	AB1-AMP64	BOLD:ACZ4489			MW056683	Paralicella caperesca	National Oceanography Center, Southampton	Mohrbeck et al. 2021	Alicellidae	Paralicella	Paralicella caperesca		Jeffrey Drazen, Clifton Nunnally	08-Oct-2013	Pacific Ocean	CP	northeast equatorial|Clarion Clipperton Zone	UK-1 lease block	Stratum A	13.881	-116.449	4203	Baited trap	A
SCAP	SCAP189-16	AB1-AMP286	BOLD:ACZ4489			MW057074	Paralicella caperesca	Deutsches Zentrum fuer Marine Biodiversitaetsforschung	Mohrbeck et al. 2021	Alicellidae	Paralicella	Paralicella caperesca		Jeffrey Drazen, Clifton Nunnally	10-Oct-2013	Pacific Ocean	CP	northeast equatorial|Clarion Clipperton Zone	UK-1 lease block	Stratum A	13.85	-116.623	4082	Baited trap	B
SCAP	SCAP187-16	AB1-AMP284	BOLD:ACZ5628			MW057034	Paralicella caperesca	Deutsches Zentrum fuer Marine Biodiversitaetsforschung	Mohrbeck et al. 2021	Alicellidae	Paralicella	Paralicella caperesca		Jeffrey Drazen, Clifton Nunnally	10-Oct-2013	Pacific Ocean	CP	northeast equatorial|Clarion Clipperton Zone	UK-1 lease block	Stratum A	13.85	-116.623	4082	Baited trap	B
SCAP	SCAP558-16	AB2-AMP757	BOLD:ACZ5625			MW056528	Paralicella caperesca	Deutsches Zentrum fuer Marine Biodiversitaetsforschung	Mohrbeck et al. 2021	Alicellidae	Paralicella	Paralicella caperesca		Clifton Nunnally	18-Feb-2015	Pacific Ocean	CP	Clarion Clipperton Zone	UK-1 exploration area	Stratum B	12.384	-116.491	4149	Baited trap	UK-1 Stratum B
SCAP	SCAP373-16	AB1-AMP532	BOLD:ACZ5630			MW057010	Paralicella caperesca	Deutsches Zentrum fuer Marine Biodiversitaetsforschung	Mohrbeck et al. 2021	Alicellidae	Paralicella	Paralicella caperesca		Jeffrey Drazen, Clifton Nunnally	10-Oct-2013	Pacific Ocean	CP	northeast equatorial|Clarion Clipperton Zone	UK-1 lease block	Stratum A	13.85	-116.623	4082	Baited trap	B
SCAP	SCAP173-16	AB1-AMP264	BOLD:ACZ5629			MW057000	Paralicella caperesca	National Oceanography Center, Southampton	Mohrbeck et al. 2021	Alicellidae	Paralicella	Paralicella caperesca		Jeffrey Drazen, Clifton Nunnally	10-Oct-2013	Pacific Ocean	CP	northeast equatorial|Clarion Clipperton Zone	UK-1 lease block	Stratum A	13.85	-116.623	4082	Baited trap	B
SCAP	SCAP168-16	AB1-AMP257	BOLD:ACZ5625			MW056862	Paralicella caperesca	Deutsches Zentrum fuer Marine Biodiversitaetsforschung	Mohrbeck et al. 2021	Alicellidae	Paralicella	Paralicella caperesca		Jeffrey Drazen, Clifton Nunnally	10-Oct-2013	Pacific Ocean	CP	northeast equatorial|Clarion Clipperton Zone	UK-1 lease block	Stratum A	13.85	-116.623	4082	Baited trap	B
SCAP	SCAP029-16	AB1-AMP35	BOLD:ACZ4489	MZ655905	MZ655953	MW056883	Paralicella caperesca	Deutsches Zentrum fuer Marine Biodiversitaetsforschung	Mohrbeck et al. 2021	Alicellidae	Paralicella	Paralicella caperesca		Jeffrey Drazen, Clifton Nunnally	08-Oct-2013	Pacific Ocean	CP	northeast equatorial|Clarion Clipperton Zone	UK-1 lease block	Stratum A	13.881	-116.449	4203	Baited trap	A
SCAP	SCAP163-16	AB1-AMP248	BOLD:ACZ4489			MW057072	Paralicella caperesca	Deutsches Zentrum fuer Marine Biodiversitaetsforschung	Mohrbeck et al. 2021	Alicellidae	Paralicella	Paralicella caperesca		Jeffrey Drazen, Clifton Nunnally	10-Oct-2013	Pacific Ocean	CP	northeast equatorial|Clarion Clipperton Zone	UK-1 lease block	Stratum A	13.85	-116.623	4082	Baited trap	B
SCAP	SCAP554-16	AB2-AMP750	BOLD:ACZ5625			MW056918	Paralicella caperesca	Deutsches Zentrum fuer Marine Biodiversitaetsforschung	Mohrbeck et al. 2021	Alicellidae	Paralicella	Paralicella caperesca		Clifton Nunnally	18-Feb-2015	Pacific Ocean	CP	Clarion Clipperton Zone	UK-1 exploration area	Stratum B	12.384	-116.491	4149	Baited trap	UK-1 Stratum B
SCAP	SCAP454-16	AB1-AMP656	BOLD:ACZ5625			MW056703	Paralicella caperesca	Deutsches Zentrum fuer Marine Biodiversitaetsforschung	Mohrbeck et al. 2021	Alicellidae	Paralicella	Paralicella caperesca		Jeffrey Drazen, Clifton Nunnally	10-Oct-2013	Pacific Ocean	CP	northeast equatorial|Clarion Clipperton Zone	UK-1 lease block	Stratum A	13.85	-116.623	4082	Baited trap	B
SCAP	SCAP150-16	AB1-AMP232	BOLD:ACZ4489			MW056882	Paralicella caperesca	Deutsches Zentrum fuer Marine Biodiversitaetsforschung	Mohrbeck et al. 2021	Alicellidae	Paralicella	Paralicella caperesca		Jeffrey Drazen, Clifton Nunnally	10-Oct-2013	Pacific Ocean	CP	northeast equatorial|Clarion Clipperton Zone	UK-1 lease block	Stratum A	13.85	-116.623	4082	Baited trap	B
SCAP	SCAP149-16	AB1-AMP230	BOLD:ACZ4489			MW056629	Paralicella caperesca	Deutsches Zentrum fuer Marine Biodiversitaetsforschung	Mohrbeck et al. 2021	Alicellidae	Paralicella	Paralicella caperesca		Jeffrey Drazen, Clifton Nunnally	10-Oct-2013	Pacific Ocean	CP	northeast equatorial|Clarion Clipperton Zone	UK-1 lease block	Stratum A	13.85	-116.623	4082	Baited trap	B
SCAP	SCAP144-16	AB1-AMP224	BOLD:ACZ5628			MW056583	Paralicella caperesca	National Oceanography Center, Southampton	Mohrbeck et al. 2021	Alicellidae	Paralicella	Paralicella caperesca		Jeffrey Drazen, Clifton Nunnally	10-Oct-2013	Pacific Ocean	CP	northeast equatorial|Clarion Clipperton Zone	UK-1 lease block	Stratum A	13.85	-116.623	4082	Baited trap	B
SCAP	SCAP138-16	AB1-AMP216	BOLD:ACZ5629			MW056630	Paralicella caperesca	National Oceanography Center, Southampton	Mohrbeck et al. 2021	Alicellidae	Paralicella	Paralicella caperesca		Jeffrey Drazen, Clifton Nunnally	10-Oct-2013	Pacific Ocean	CP	northeast equatorial|Clarion Clipperton Zone	UK-1 lease block	Stratum A	13.85	-116.623	4082	Baited trap	B
SCAP	SCAP109-16	AB1-AMP172	BOLD:ACZ4489			MW057116	Paralicella caperesca	Deutsches Zentrum fuer Marine Biodiversitaetsforschung	Mohrbeck et al. 2021	Alicellidae	Paralicella	Paralicella caperesca		Jeffrey Drazen, Clifton Nunnally	10-Oct-2013	Pacific Ocean	CP	northeast equatorial|Clarion Clipperton Zone	UK-1 lease block	Stratum A	13.85	-116.623	4082	Baited trap	B
SCAP	SCAP106-16	AB1-AMP169	BOLD:ACZ5629			MW056739	Paralicella caperesca	Deutsches Zentrum fuer Marine Biodiversitaetsforschung	Mohrbeck et al. 2021	Alicellidae	Paralicella	Paralicella caperesca		Jeffrey Drazen, Clifton Nunnally	10-Oct-2013	Pacific Ocean	CP	northeast equatorial|Clarion Clipperton Zone	UK-1 lease block	Stratum A	13.85	-116.623	4082	Baited trap	B
SCAP	SCAP101-16	AB1-AMP162	BOLD:ACZ4489			MW057099	Paralicella caperesca	Deutsches Zentrum fuer Marine Biodiversitaetsforschung	Mohrbeck et al. 2021	Alicellidae	Paralicella	Paralicella caperesca		Jeffrey Drazen, Clifton Nunnally	10-Oct-2013	Pacific Ocean	CP	northeast equatorial|Clarion Clipperton Zone	UK-1 lease block	Stratum A	13.85	-116.623	4082	Baited trap	B
SCAP	SCAP096-16	AB1-AMP157	BOLD:ACZ5629			MW056771	Paralicella caperesca	National Oceanography Center, Southampton	Mohrbeck et al. 2021	Alicellidae	Paralicella	Paralicella caperesca		Jeffrey Drazen, Clifton Nunnally	10-Oct-2013	Pacific Ocean	CP	northeast equatorial|Clarion Clipperton Zone	UK-1 lease block	Stratum A	13.85	-116.623	4082	Baited trap	B
SCAP	SCAP628-16	AB2-AMP2245	BOLD:ACZ5625			MW056853	Paralicella caperesca	Deutsches Zentrum fuer Marine Biodiversitaetsforschung	Mohrbeck et al. 2021	Alicellidae	Paralicella	Paralicella caperesca		Clifton Nunnally	24-Feb-2015	Pacific Ocean	CP	Clarion Clipperton Zone	OMS-1 exploration area	Stratum A	12.118	-117.35	4183	Baited trap	OMS-1 Stratum A
SCAP	SCAP627-16	AB2-AMP2244	BOLD:ACZ5625			MW056966	Paralicella caperesca	Deutsches Zentrum fuer Marine Biodiversitaetsforschung	Mohrbeck et al. 2021	Alicellidae	Paralicella	Paralicella caperesca		Clifton Nunnally	24-Feb-2015	Pacific Ocean	CP	Clarion Clipperton Zone	OMS-1 exploration area	Stratum A	12.118	-117.35	4183	Baited trap	OMS-1 Stratum A
SCAP	SCAP083-16	AB1-AMP139	BOLD:ACZ4489			MW056811	Paralicella caperesca	National Oceanography Center, Southampton	Mohrbeck et al. 2021	Alicellidae	Paralicella	Paralicella caperesca		Jeffrey Drazen, Clifton Nunnally	10-Oct-2013	Pacific Ocean	CP	northeast equatorial|Clarion Clipperton Zone	UK-1 lease block	Stratum A	13.85	-116.623	4082	Baited trap	B
SCAP	SCAP693-16	AB2-AMP3896	BOLD:ACZ5627	MZ655903	MZ655949	MW056860	Paralicella caperesca	Deutsches Zentrum fuer Marine Biodiversitaetsforschung	Mohrbeck et al. 2021	Alicellidae	Paralicella	Paralicella caperesca		Clifton Nunnally	20-Mar-2015	Pacific Ocean	CP	Clarion Clipperton Zone	Area of Particular Environmental Interest	Stratum A	19.451	-120.053	4057	Baited trap	APEI-6 Stratum A
SCAP	SCAP689-16	AB2-AMP3888	BOLD:ACZ5627			MW056681	Paralicella caperesca	Deutsches Zentrum fuer Marine Biodiversitaetsforschung	Mohrbeck et al. 2021	Alicellidae	Paralicella	Paralicella caperesca		Clifton Nunnally	20-Mar-2015	Pacific Ocean	CP	Clarion Clipperton Zone	Area of Particular Environmental Interest	Stratum A	19.451	-120.053	4057	Baited trap	APEI-6 Stratum A
SCAP	SCAP684-16	AB2-AMP3877	BOLD:ACZ5631			MW056665	Paralicella caperesca	Deutsches Zentrum fuer Marine Biodiversitaetsforschung	Mohrbeck et al. 2021	Alicellidae	Paralicella	Paralicella caperesca		Clifton Nunnally	20-Mar-2015	Pacific Ocean	CP	Clarion Clipperton Zone	Area of Particular Environmental Interest	Stratum A	19.451	-120.053	4057	Baited trap	APEI-6 Stratum A
SCAP	SCAP682-16	AB2-AMP3875	BOLD:ACZ5627			MW056724	Paralicella caperesca	Deutsches Zentrum fuer Marine Biodiversitaetsforschung	Mohrbeck et al. 2021	Alicellidae	Paralicella	Paralicella caperesca		Clifton Nunnally	20-Mar-2015	Pacific Ocean	CP	Clarion Clipperton Zone	Area of Particular Environmental Interest	Stratum A	19.451	-120.053	4057	Baited trap	APEI-6 Stratum A
SCAP	SCAP681-16	AB2-AMP3871	BOLD:ACZ5627			MW056865	Paralicella caperesca	Deutsches Zentrum fuer Marine Biodiversitaetsforschung	Mohrbeck et al. 2021	Alicellidae	Paralicella	Paralicella caperesca		Clifton Nunnally	20-Mar-2015	Pacific Ocean	CP	Clarion Clipperton Zone	Area of Particular Environmental Interest	Stratum A	19.451	-120.053	4057	Baited trap	APEI-6 Stratum A
SCAP	SCAP680-16	AB2-AMP3862	BOLD:ACZ5625			MW057119	Paralicella caperesca	Deutsches Zentrum fuer Marine Biodiversitaetsforschung	Mohrbeck et al. 2021	Alicellidae	Paralicella	Paralicella caperesca		Clifton Nunnally	20-Mar-2015	Pacific Ocean	CP	Clarion Clipperton Zone	Area of Particular Environmental Interest	Stratum A	19.451	-120.053	4057	Baited trap	APEI-4 Stratum A
SCAP	SCAP678-16	AB2-AMP3859	BOLD:ACZ5628			MW056553	Paralicella caperesca	Deutsches Zentrum fuer Marine Biodiversitaetsforschung	Mohrbeck et al. 2021	Alicellidae	Paralicella	Paralicella caperesca		Clifton Nunnally	20-Mar-2015	Pacific Ocean	CP	Clarion Clipperton Zone	Area of Particular Environmental Interest	Stratum A	19.451	-120.053	4057	Baited trap	APEI-6 Stratum A
SCAP	SCAP066-16	AB1-AMP113	BOLD:ACZ4489			MW057026	Paralicella caperesca	Deutsches Zentrum fuer Marine Biodiversitaetsforschung	Mohrbeck et al. 2021	Alicellidae	Paralicella	Paralicella caperesca		Jeffrey Drazen, Clifton Nunnally	10-Oct-2013	Pacific Ocean	CP	northeast equatorial|Clarion Clipperton Zone	UK-1 lease block	Stratum A	13.85	-116.623	4082	Baited trap	B
SCAP	SCAP065-16	AB1-AMP112	BOLD:ACZ4489			MW056590	Paralicella caperesca	Deutsches Zentrum fuer Marine Biodiversitaetsforschung	Mohrbeck et al. 2021	Alicellidae	Paralicella	Paralicella caperesca		Jeffrey Drazen, Clifton Nunnally	10-Oct-2013	Pacific Ocean	CP	northeast equatorial|Clarion Clipperton Zone	UK-1 lease block	Stratum A	13.85	-116.623	4082	Baited trap	B
SCAP	SCAP675-16	AB2-AMP3696	BOLD:ACZ5629			MW056560	Paralicella caperesca	Deutsches Zentrum fuer Marine Biodiversitaetsforschung	Mohrbeck et al. 2021	Alicellidae	Paralicella	Paralicella caperesca		Clifton Nunnally	13-Mar-2015	Pacific Ocean	CP	Clarion Clipperton Zone	OMS-1 exploration area	Stratum A	12.055	-117.227	4071	Baited trap	OMS-1 Stratum A
SCAP	SCAP063-16	AB1-AMP110	BOLD:ACZ4489			MW056757	Paralicella caperesca	Deutsches Zentrum fuer Marine Biodiversitaetsforschung	Mohrbeck et al. 2021	Alicellidae	Paralicella	Paralicella caperesca		Jeffrey Drazen, Clifton Nunnally	10-Oct-2013	Pacific Ocean	CP	northeast equatorial|Clarion Clipperton Zone	UK-1 lease block	Stratum A	13.85	-116.623	4082	Baited trap	B
SCAP	SCAP667-16	AB2-AMP3677	BOLD:ACZ5627			MW056713	Paralicella caperesca	Deutsches Zentrum fuer Marine Biodiversitaetsforschung	Mohrbeck et al. 2021	Alicellidae	Paralicella	Paralicella caperesca		Clifton Nunnally	13-Mar-2015	Pacific Ocean	CP	Clarion Clipperton Zone	OMS-1 exploration area	Stratum A	12.055	-117.227	4071	Baited trap	OMS-1 Stratum A
SCAP	SCAP054-16	AB1-AMP68	BOLD:ACZ5630	MZ655902	MZ655948	MW056856	Paralicella caperesca	National Oceanography Center, Southampton	Mohrbeck et al. 2021	Alicellidae	Paralicella	Paralicella caperesca		Jeffrey Drazen, Clifton Nunnally	08-Oct-2013	Pacific Ocean	CP	northeast equatorial|Clarion Clipperton Zone	UK-1 lease block	Stratum A	13.881	-116.449	4203	Baited trap	A
SCAP	SCAP536-16	AB2-AMP698	BOLD:ACZ5629			MW056600	Paralicella caperesca	Deutsches Zentrum fuer Marine Biodiversitaetsforschung	Mohrbeck et al. 2021	Alicellidae	Paralicella	Paralicella caperesca		Clifton Nunnally	20-Mar-2015	Pacific Ocean	CP	Clarion Clipperton Zone	Area of Particular Environmental Interest	Stratum A	19.451	-120.053	4057	Baited trap	APEI-6 Stratum A
SCAP	SCAP663-16	AB2-AMP3673	BOLD:ACZ5629			MW056846	Paralicella caperesca	Deutsches Zentrum fuer Marine Biodiversitaetsforschung	Mohrbeck et al. 2021	Alicellidae	Paralicella	Paralicella caperesca		Clifton Nunnally	13-Mar-2015	Pacific Ocean	CP	Clarion Clipperton Zone	OMS-1 exploration area	Stratum A	12.055	-117.227	4071	Baited trap	OMS-1 Stratum A
SCAP	SCAP661-16	AB2-AMP3670	BOLD:ACZ5625			MW056984	Paralicella caperesca	Deutsches Zentrum fuer Marine Biodiversitaetsforschung	Mohrbeck et al. 2021	Alicellidae	Paralicella	Paralicella caperesca		Clifton Nunnally	13-Mar-2015	Pacific Ocean	CP	Clarion Clipperton Zone	OMS-1 exploration area	Stratum A	12.055	-117.227	4071	Baited trap	OMS-1 Stratum A
SCAP	SCAP660-16	AB2-AMP3669	BOLD:ACZ5629			MW056828	Paralicella caperesca	Deutsches Zentrum fuer Marine Biodiversitaetsforschung	Mohrbeck et al. 2021	Alicellidae	Paralicella	Paralicella caperesca		Clifton Nunnally	13-Mar-2015	Pacific Ocean	CP	Clarion Clipperton Zone	OMS-1 exploration area	Stratum A	12.055	-117.227	4071	Baited trap	OMS-1 Stratum A
SCAP	SCAP047-16	AB1-AMP59	BOLD:ACZ4489			MW056546	Paralicella caperesca	Deutsches Zentrum fuer Marine Biodiversitaetsforschung	Mohrbeck et al. 2021	Alicellidae	Paralicella	Paralicella caperesca		Jeffrey Drazen, Clifton Nunnally	08-Oct-2013	Pacific Ocean	CP	northeast equatorial|Clarion Clipperton Zone	UK-1 lease block	Stratum A	13.881	-116.449	4203	Baited trap	A
SCAP	SCAP657-16	AB2-AMP3657	BOLD:ACZ4905			MW057155	Paralicella caperesca	Deutsches Zentrum fuer Marine Biodiversitaetsforschung	Mohrbeck et al. 2021	Alicellidae	Paralicella	Paralicella caperesca		Clifton Nunnally	13-Mar-2015	Pacific Ocean	CP	Clarion Clipperton Zone	OMS-1 exploration area	Stratum A	12.055	-117.227	4071	Baited trap	OMS-1 Stratum A
SCAP	SCAP539-16	AB2-AMP705	BOLD:ACZ4905			MW056875	Paralicella caperesca	Deutsches Zentrum fuer Marine Biodiversitaetsforschung	Mohrbeck et al. 2021	Alicellidae	Paralicella	Paralicella caperesca		Clifton Nunnally	18-Feb-2015	Pacific Ocean	CP	Clarion Clipperton Zone	UK-1 exploration area	Stratum B	12.384	-116.491	4149	Baited trap	UK-1 Stratum B
SCAP	SCAP648-16	AB2-AMP2293	BOLD:ACZ5625			MW056725	Paralicella caperesca	Deutsches Zentrum fuer Marine Biodiversitaetsforschung	Mohrbeck et al. 2021	Alicellidae	Paralicella	Paralicella caperesca		Clifton Nunnally	24-Feb-2015	Pacific Ocean	CP	Clarion Clipperton Zone	OMS-1 exploration area	Stratum A	12.118	-117.35	4183	Baited trap	OMS-1 Stratum A
SCAP	SCAP647-16	AB2-AMP2292	BOLD:ACZ5629	MZ655897	MZ655926	MW056675	Paralicella caperesca	Deutsches Zentrum fuer Marine Biodiversitaetsforschung	Mohrbeck et al. 2021	Alicellidae	Paralicella	Paralicella caperesca		Clifton Nunnally	24-Feb-2015	Pacific Ocean	CP	Clarion Clipperton Zone	OMS-1 exploration area	Stratum A	12.118	-117.35	4183	Baited trap	OMS-1 Stratum A
SCAP	SCAP646-16	AB2-AMP2290	BOLD:ACZ5625			MW056943	Paralicella caperesca	Deutsches Zentrum fuer Marine Biodiversitaetsforschung	Mohrbeck et al. 2021	Alicellidae	Paralicella	Paralicella caperesca		Clifton Nunnally	24-Feb-2015	Pacific Ocean	CP	Clarion Clipperton Zone	OMS-1 exploration area	Stratum A	12.118	-117.35	4183	Baited trap	OMS-1 Stratum A
SCAP	SCAP644-16	AB2-AMP2287	BOLD:ACZ5629			MW057115	Paralicella caperesca	Deutsches Zentrum fuer Marine Biodiversitaetsforschung	Mohrbeck et al. 2021	Alicellidae	Paralicella	Paralicella caperesca		Clifton Nunnally	24-Feb-2015	Pacific Ocean	CP	Clarion Clipperton Zone	OMS-1 exploration area	Stratum A	12.118	-117.35	4183	Baited trap	OMS-1 Stratum A
SCAP	SCAP626-16	AB2-AMP2243	BOLD:ACZ6237			MW056798	Paralicella tenuipes	Deutsches Zentrum fuer Marine Biodiversitaetsforschung	Mohrbeck et al. 2021	Alicellidae	Paralicella	Paralicella tenuipes		Clifton Nunnally	24-Feb-2015	Pacific Ocean	CP	Clarion Clipperton Zone	OMS-1 exploration area	Stratum A	12.118	-117.35	4183	Baited trap	OMS-1 Stratum A
SCAP	SCAP625-16	AB2-AMP2242	BOLD:ACZ6237			MW056962	Paralicella tenuipes	Deutsches Zentrum fuer Marine Biodiversitaetsforschung	Mohrbeck et al. 2021	Alicellidae	Paralicella	Paralicella tenuipes		Clifton Nunnally	24-Feb-2015	Pacific Ocean	CP	Clarion Clipperton Zone	OMS-1 exploration area	Stratum A	12.118	-117.35	4183	Baited trap	OMS-1 Stratum A
SCAP	SCAP624-16	AB2-AMP2232	BOLD:ACZ6441			MW056515	Paralicella tenuipes	Deutsches Zentrum fuer Marine Biodiversitaetsforschung	Mohrbeck et al. 2021	Alicellidae	Paralicella	Paralicella tenuipes		Clifton Nunnally	24-Feb-2015	Pacific Ocean	CP	Clarion Clipperton Zone	OMS-1 exploration area	Stratum A	12.118	-117.35	4183	Baited trap	OMS-1 Stratum A
SCAP	SCAP623-16	AB2-AMP2229	BOLD:ACZ6237			MW056579	Paralicella tenuipes	Deutsches Zentrum fuer Marine Biodiversitaetsforschung	Mohrbeck et al. 2021	Alicellidae	Paralicella	Paralicella tenuipes		Clifton Nunnally	24-Feb-2015	Pacific Ocean	CP	Clarion Clipperton Zone	OMS-1 exploration area	Stratum A	12.118	-117.35	4183	Baited trap	OMS-1 Stratum A
SCAP	SCAP621-16	AB2-AMP2226	BOLD:ACZ6441			MW056517	Paralicella tenuipes	Deutsches Zentrum fuer Marine Biodiversitaetsforschung	Mohrbeck et al. 2021	Alicellidae	Paralicella	Paralicella tenuipes		Clifton Nunnally	24-Feb-2015	Pacific Ocean	CP	Clarion Clipperton Zone	OMS-1 exploration area	Stratum A	12.118	-117.35	4183	Baited trap	OMS-1 Stratum A
SCAP	SCAP620-16	AB2-AMP2225	BOLD:ACZ6441			MW056936	Paralicella tenuipes	Deutsches Zentrum fuer Marine Biodiversitaetsforschung	Mohrbeck et al. 2021	Alicellidae	Paralicella	Paralicella tenuipes		Clifton Nunnally	24-Feb-2015	Pacific Ocean	CP	Clarion Clipperton Zone	OMS-1 exploration area	Stratum A	12.118	-117.35	4183	Baited trap	OMS-1 Stratum A
SCAP	SCAP619-16	AB2-AMP2223	BOLD:ACZ6441			MW056960	Paralicella tenuipes	Deutsches Zentrum fuer Marine Biodiversitaetsforschung	Mohrbeck et al. 2021	Alicellidae	Paralicella	Paralicella tenuipes		Clifton Nunnally	24-Feb-2015	Pacific Ocean	CP	Clarion Clipperton Zone	OMS-1 exploration area	Stratum A	12.118	-117.35	4183	Baited trap	OMS-1 Stratum A
SCAP	SCAP618-16	AB2-AMP2222	BOLD:ACZ6237			MW056873	Paralicella tenuipes	Deutsches Zentrum fuer Marine Biodiversitaetsforschung	Mohrbeck et al. 2021	Alicellidae	Paralicella	Paralicella tenuipes		Clifton Nunnally	24-Feb-2015	Pacific Ocean	CP	Clarion Clipperton Zone	OMS-1 exploration area	Stratum A	12.118	-117.35	4183	Baited trap	OMS-1 Stratum A
SCAP	SCAP616-16	AB2-AMP2216	BOLD:ACZ6441	MZ655909	MZ655966	MW057127	Paralicella tenuipes	Deutsches Zentrum fuer Marine Biodiversitaetsforschung	Mohrbeck et al. 2021	Alicellidae	Paralicella	Paralicella tenuipes		Clifton Nunnally	21-Feb-2015	Pacific Ocean	CP	Clarion Clipperton Zone	UK-1 exploration area	Stratum B	12.563	-116.717	4193	Baited trap	UK-1 Stratum B
SCAP	SCAP615-16	AB2-AMP2214	BOLD:ACZ6441			MW056752	Paralicella tenuipes	Deutsches Zentrum fuer Marine Biodiversitaetsforschung	Mohrbeck et al. 2021	Alicellidae	Paralicella	Paralicella tenuipes		Clifton Nunnally	21-Feb-2015	Pacific Ocean	CP	Clarion Clipperton Zone	UK-1 exploration area	Stratum B	12.563	-116.717	4193	Baited trap	UK-1 Stratum B
SCAP	SCAP614-16	AB2-AMP2210	BOLD:ACZ6236			MW056655	Paralicella tenuipes	Deutsches Zentrum fuer Marine Biodiversitaetsforschung	Mohrbeck et al. 2021	Alicellidae	Paralicella	Paralicella tenuipes		Clifton Nunnally	21-Feb-2015	Pacific Ocean	CP	Clarion Clipperton Zone	UK-1 exploration area	Stratum B	12.563	-116.717	4193	Baited trap	UK-1 Stratum B
GBCM	GBCM10028-17	KP713930	BOLD:ACZ6441		KP456112.1	KP713930	Paralicella tenuipes	Mined from GenBank, NCBI	Ritchie et al. 2015	Alicellidae	Paralicella	Paralicella tenuipes				Pacific Ocean	NWP	Japan Trench			40.250000	144.500000	6945
GBCM	GBCM8011-17	KP713928	BOLD:ACZ6235		KP456110.1	KP713928	Paralicella tenuipes	Mined from GenBank, NCBI	Ritchie et al. 2015	Alicellidae	Paralicella	Paralicella tenuipes				Pacific Ocean	NWP	Mariana Trench			18.816667	149.833333	5469
GBCM	GBCM9223-17	KP713934	BOLD:ACZ6237		KP347450.1	KP713934	Paralicella tenuipes	Mined from GenBank, NCBI	Ritchie et al. 2015	Alicellidae	Paralicella	Paralicella tenuipes				Pacific Ocean	SEP	Peru-Chile Trench			-7.800000	-81.283333	6173
GBCM	GBCM6246-17	KP713929	BOLD:ACZ6441		KP456111.1	KP713929	Paralicella tenuipes	Mined from GenBank, NCBI	Ritchie et al. 2015	Alicellidae	Paralicella	Paralicella tenuipes				Pacific Ocean	NWP	Mariana Trench			18.816667	149.833333	5469
GBA	GBMNC73935-20	LC484993	BOLD:ACZ6441			LC484993	Amphipoda	Mined from GenBank, NCBI	Iguchi et al. 2020				GB_ori:Amphipoda sp. B05-6			Pacific Ocean	NWP	NWP			19.375500	157.882833	3818
GBCM	GBCM9507-17	KP713931	BOLD:ACZ6237		KP456113.1	KP713931	Paralicella tenuipes	Mined from GenBank, NCBI	Ritchie et al. 2015	Alicellidae	Paralicella	Paralicella tenuipes				Pacific Ocean	NWP	Japan Trench			40.250000	144.500000	6945
GBA	GBMNC73920-20	LC484994	BOLD:AEG0263			LC484994	Amphipoda	Mined from GenBank, NCBI	Iguchi et al. 2020				GB_ori:Amphipoda sp. B05-7			Pacific Ocean	NWP	NWP			19.375500	157.882833	3818
GBCM	GBCM7216-17	KP713921	BOLD:ACZ4903		KP456105.1	KP713921	Paralicella caperesca	Mined from GenBank, NCBI	Ritchie et al. 2015	Alicellidae	Paralicella	Paralicella caperesca				Pacific Ocean	SWP	New Hebrides Trench			-21.216667	168.233333	2500
GBCM	GBCM10027-17	KP713926	BOLD:ADD2497		KP456098.1	KP713926	Paralicella tenuipes	Mined from GenBank, NCBI	Ritchie et al. 2015	Alicellidae	Paralicella	Paralicella tenuipes				Pacific Ocean	SWP	South Fidji Basin			-24.966667	171.050000	4100
GBCM	GBCM8982-17	KP713922	BOLD:ACZ4489		KP456108.1	KP713922	Paralicella caperesca	Mined from GenBank, NCBI	Ritchie et al. 2015	Alicellidae	Paralicella	Paralicella caperesca				Pacific Ocean	SEP	Peru-Chile Trench			-4.450000	-81.900000	5329
GBCM	GBCM13269-19	KP713923	BOLD:ACZ5627		KP456107.1	KP713923	Paralicella caperesca	Mined from GenBank, NCBI	Ritchie et al. 2015	Alicellidae	Paralicella	Paralicella caperesca				Pacific Ocean	SEP	Peru-Chile Trench			-7.800000	-81.283333	6173
GBCM	GBCM7049-17	KP713924	BOLD:ACZ5625		KP456101.1	KP713924	Paralicella caperesca	Mined from GenBank, NCBI	Ritchie et al. 2015	Alicellidae	Paralicella	Paralicella caperesca				Pacific Ocean	SWP	Kermadec Trench			-26.716667	-175.183333	6007
GBCM	GBCM11527-17	KP713920	BOLD:ADD2497		KP456097.1	KP713920	Paralicella caperesca	Mined from GenBank, NCBI	Ritchie et al. 2015	Alicellidae	Paralicella	Paralicella caperesca				Pacific Ocean	SWP	New Hebrides Trench			-21.216667	168.233333	2500
GBA	GBMNC73936-20	LC484992	BOLD:ACZ6571			LC484992	Amphipoda	Mined from GenBank, NCBI	Iguchi et al. 2020				GB_ori:Amphipoda sp. B05-5			Pacific Ocean	NWP	NWP			19.375500	157.882833	3818
GBA	GBMNC73934-20	LC484978	BOLD:ACZ4903			LC484978	Amphipoda	Mined from GenBank, NCBI	Iguchi et al. 2020				GB_ori:Amphipoda sp. B05-10			Pacific Ocean	NWP	NWP			19.375500	157.882833	3818
GBA	GBMNC73932-20	LC484980	BOLD:ADD2497			LC484980	Amphipoda	Mined from GenBank, NCBI	Iguchi et al. 2020				GB_ori:Amphipoda sp. B05-12			Pacific Ocean	NWP	NWP			19.375500	157.882833	3818
GBA	GBMNC73929-20	LC484983	BOLD:ACZ6571			LC484983	Amphipoda	Mined from GenBank, NCBI	Iguchi et al. 2020				GB_ori:Amphipoda sp. B05-15			Pacific Ocean	NWP	NWP			19.375500	157.882833	3818
GBA	GBMNC73928-20	LC484984	BOLD:ACZ6571			LC484984	Amphipoda	Mined from GenBank, NCBI	Iguchi et al. 2020				GB_ori:Amphipoda sp. B05-16			Pacific Ocean	NWP	NWP			19.375500	157.882833	3818
GBA	GBMNC73927-20	LC484985	BOLD:ADD2497			LC484985	Amphipoda	Mined from GenBank, NCBI	Iguchi et al. 2020				GB_ori:Amphipoda sp. B05-17			Pacific Ocean	NWP	NWP			19.375500	157.882833	3818
GBA	GBMNC73926-20	LC484986	BOLD:ADD2497			LC484986	Amphipoda	Mined from GenBank, NCBI	Iguchi et al. 2020				GB_ori:Amphipoda sp. B05-18			Pacific Ocean	NWP	NWP			19.375500	157.882833	3818
GBA	GBMNC73925-20	LC484987	BOLD:ADD2497			LC484987	Amphipoda	Mined from GenBank, NCBI	Iguchi et al. 2020				GB_ori:Amphipoda sp. B05-19			Pacific Ocean	NWP	NWP			19.375500	157.882833	3818
GBCM	GBCM7800-17	KP713932	BOLD:ADD2929		KP456104.1	KP713932	Paralicella tenuipes	Mined from GenBank, NCBI	Ritchie et al. 2015	Alicellidae	Paralicella	Paralicella tenuipes				Pacific Ocean	SWP	Kermadec Trench			-26.716667	-175.183333	6007
GBA	GBMNC73921-20	LC484991	BOLD:ACZ6571			LC484991	Amphipoda	Mined from GenBank, NCBI	Iguchi et al. 2020				GB_ori:Amphipoda sp. B05-4			Pacific Ocean	NWP	NWP			19.375500	157.882833	3818
GBA	GBMNC73919-20	LC484995	BOLD:ADD2497			LC484995	Amphipoda	Mined from GenBank, NCBI	Iguchi et al. 2020				GB_ori:Amphipoda sp. B05-8			Pacific Ocean	NWP	NWP			19.375500	157.882833	3818
GBA	GBMNC73918-20	LC484996	BOLD:ADD2497			LC484996	Amphipoda	Mined from GenBank, NCBI	Iguchi et al. 2020				GB_ori:Amphipoda sp. B05-9			Pacific Ocean	NWP	NWP			19.375500	157.882833	3818
GBCM	GBCM6245-17	KP713917	BOLD:ACZ5625		KP456102.1	KP713917	Amphipoda	Mined from GenBank, NCBI	Ritchie et al. 2015				Lysianassoidea sp. Primitive 2 HR-2015			Pacific Ocean	NWP	Mariana Trench			18.816667	149.833333	5469
GBCM	GBCM5730-17	KP713916	BOLD:ACZ6571		KP456100.1	KP713916	Amphipoda	Mined from GenBank, NCBI	Ritchie et al. 2015				Lysianassoidea sp. Primitive 1 HR-2015			Pacific Ocean	NWP	Mariana Trench			18.816667	149.833333	5469
GBCM	GBCM8800-17	KP713933	BOLD:ADD2929		KP456103.1	KP713933	Paralicella tenuipes	Mined from GenBank, NCBI	Ritchie et al. 2015	Alicellidae	Paralicella	Paralicella tenuipes				Pacific Ocean	SWP	Kermadec Trench			-26.716667	-175.183333	6007
GBCM	GBCM8408-17	KP713925	BOLD:ACZ4905		KP456099.1	KP713925	Paralicella caperesca	Mined from GenBank, NCBI	Ritchie et al. 2015	Alicellidae	Paralicella	Paralicella caperesca				Pacific Ocean	SWP	Kermadec Trench			-26.716667	-175.183333	6007
GBCM	GBCM9555-17	KP713927	BOLD:ACZ4903		KP456106.1	KP713927	Paralicella tenuipes	Mined from GenBank, NCBI	Ritchie et al. 2015	Alicellidae	Paralicella	Paralicella tenuipes				Pacific Ocean	SWP	South Fidji Basin			-24.966667	171.050000	4100
AJAKK	AJAKK121-16	1-10S_Lysi8_2012_1	BOLD:ADP2618		MN228705	MN346213	Paralicella	University of Lodz, Dept of Invertebrate Zoology and Hydrobiology	Jażdżewska & Mamos 2019	Alicellidae	Paralicella			Angelika Brandt	30-Jul-2012	Pacific Ocean	NWP	Kuril-Kamchatka			43.9724	157.302	5423	Epibenthic sled, supra-net	SO-223-1-10
